# Supplementary material for: An unexpected imidazole-induced porphyrinylphosphonate-based MOF-to-HOF structural transformation leading to the enhancement of proton conductivity
Source: Royal Society of Chemistry journal article supplement (doi:10.1039/d4dt02143f), 2024-01-01
Supplement: d4dt02143f1.pdf [file d4dt02143f1.pdf]

## Electronic Supporting Information

### An Unexpected Imidazole-Induced Porphyrinylphosphonate-Based MOF-to-HOF Structural Transformation Leading to the Enhancement of Proton Conductivity

Ekaterina A. Zhigileva,<sup>a</sup> Yulia Yu. Enakieva,<sup>b\*</sup> Vladimir V. Chernyshev,<sup>a,b\*</sup> Ivan N. Senchikhin,<sup>b</sup>  
Liudmila I. Demina,<sup>b</sup> Alexander G. Martynov,<sup>b</sup> Irina A. Stenina,<sup>c</sup> Andrey B. Yaroslavtsev,<sup>c</sup> Yulia  
G. Gorbunova<sup>b,c</sup> and Aslan Yu. Tsivadze<sup>b,c</sup>

<sup>a</sup> *Department of Chemistry, Lomonosov Moscow State University, Leninskie Gory, 1-3, Moscow 119991, Russia*

<sup>b</sup> *Frumkin Institute of Physical Chemistry and Electrochemistry, Russian Academy of Sciences, Leninskiy prosp. 31, Building 4, Moscow 119071, Russia*

<sup>c</sup> *Kurnakov Institute of General and Inorganic Chemistry, Russian Academy of Sciences, Leninskiy prosp. 31, Moscow 119991, Russia*

#### TABLE OF CONTENTS

|                                                                                 |    |
|---------------------------------------------------------------------------------|----|
| Spectral characterization of <b>IPCE-1Pd</b> , <b>IPCE-1Pd_Im</b> and HIm ..... | 2  |
| Structural characterization of <b>IPCE-1Pd</b> .....                            | 3  |
| Structural characterization of <b>IPCE-1Pd_Im</b> .....                         | 10 |
| SEM and EDX data of <b>IPCE-1Pd</b> .....                                       | 17 |
| XPS data of <b>IPCE-1Pd</b> .....                                               | 19 |
| Thermal investigations of <b>IPCE-1Pd</b> .....                                 | 21 |
| Chemical stability of <b>IPCE-1Pd</b> .....                                     | 22 |
| EDX data of <b>IPCE-1Pd_Im</b> .....                                            | 22 |
| Thermal investigations of <b>IPCE-1Pd_Im</b> .....                              | 23 |
| Proton conductivity of <b>IPCE-1Pd</b> and <b>IPCE-1Pd_Im</b> .....             | 24 |
| Crystal packings of <b>IPCE-1Pd</b> and <b>IPCE-1Pd_Im</b> .....                | 27 |

## Spectral characterization of IPCE-1Pd, IPCE-1Pd\_Im and HIm

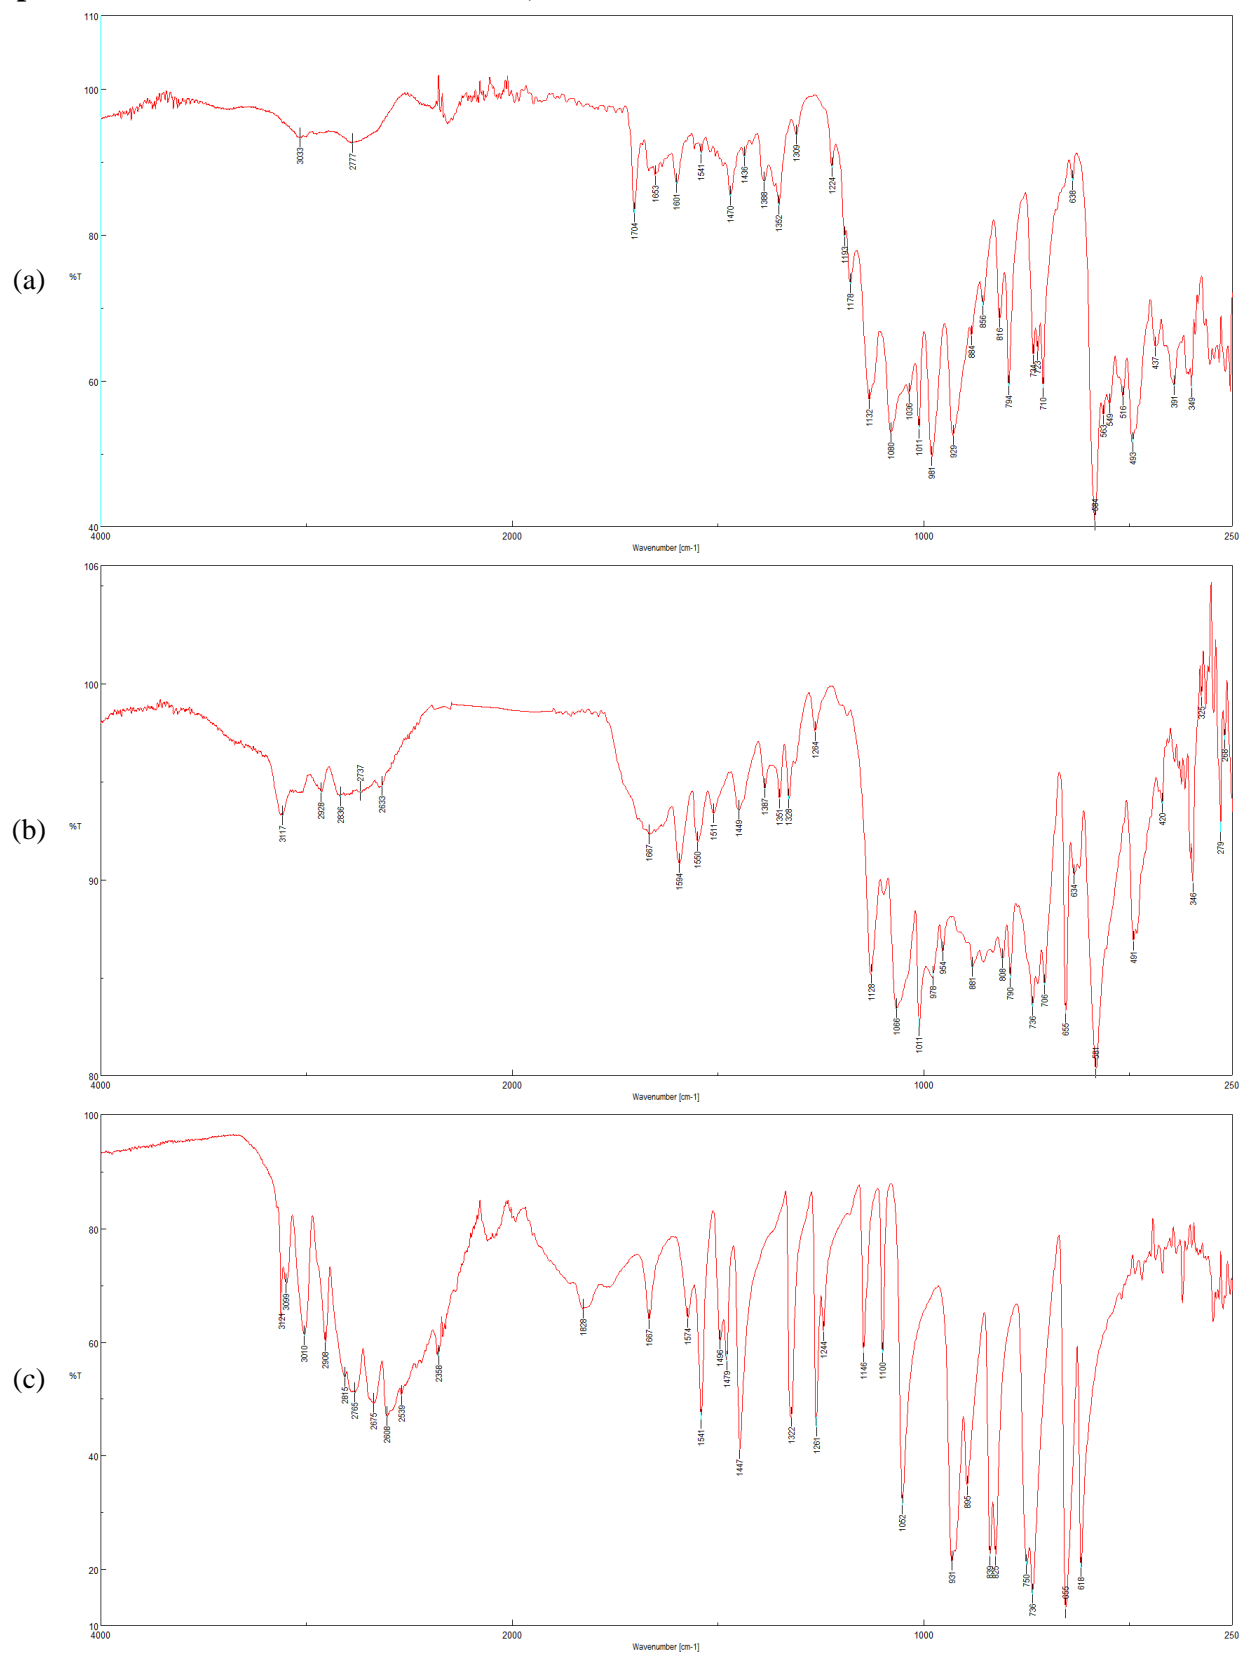

**Figure S1.** IR spectra of IPCE-1Pd – (a), IPCE-1Pd\_Im – (b) and imidazole – (c).

**Structural characterization of IPCE-1Pd****Table S1.** Crystal data and structure refinement for **IPCE-1Pd**.

|                                                                          |                                                                                                                                                         |
|--------------------------------------------------------------------------|---------------------------------------------------------------------------------------------------------------------------------------------------------|
| Identification code                                                      | <b>IPCE-1Pd</b>                                                                                                                                         |
| CCDC number                                                              | 2082843                                                                                                                                                 |
| Empirical formula                                                        | [C <sub>44</sub> H <sub>28</sub> N <sub>4</sub> O <sub>12</sub> P <sub>4</sub> PdZn <sub>2</sub> ·2(C <sub>3</sub> H <sub>7</sub> NO)·H <sub>2</sub> O] |
| Formula weight                                                           | 1329.93                                                                                                                                                 |
| Wavelength, Å                                                            | 1.5418                                                                                                                                                  |
| Crystal system                                                           | monoclinic                                                                                                                                              |
| Space group                                                              | <i>P</i> 2 <sub>1</sub> / <i>n</i>                                                                                                                      |
| <i>a</i> , Å                                                             | 20.5052(18)                                                                                                                                             |
| <i>b</i> , Å                                                             | 25.899(2)                                                                                                                                               |
| <i>c</i> , Å                                                             | 5.2570(7)                                                                                                                                               |
| $\beta$ , °                                                              | 93.923(11)                                                                                                                                              |
| Volume, Å <sup>3</sup>                                                   | 2785.3(5)                                                                                                                                               |
| <i>Z</i>                                                                 | 2                                                                                                                                                       |
| <i>D</i> <sub>x</sub> , g cm <sup>-3</sup>                               | 1.588                                                                                                                                                   |
| 2 $\theta$ min – 2 $\theta$ max,<br>increment, °                         | 4.000 – 70.000, 0.017                                                                                                                                   |
| No. params/restraints                                                    | 153/184                                                                                                                                                 |
| <i>R</i> <sub>p</sub> / <i>R</i> <sub>wp</sub> / <i>R</i> <sub>exp</sub> | 0.0393/0.0522/0.0267                                                                                                                                    |
| Goodness-of-fit                                                          | 1.954                                                                                                                                                   |

**Table S2.** Bond lengths in **IPCE-1Pd**.

| Atom | Atom | Length/Å  | Atom | Atom | Length/Å  |
|------|------|-----------|------|------|-----------|
| Pd1  | N2   | 2.029(11) | C17  | P2   | 1.848(14) |
| Pd1  | N2   | 2.029(11) | C18  | C19  | 1.39(2)   |
| Pd1  | N1   | 2.059(11) | C18  | H18  | 0.9300    |
| Pd1  | N1   | 2.059(11) | C19  | H19  | 0.9300    |
| N1   | C1   | 1.366(17) | C20  | C21  | 1.425(19) |
| N1   | C20  | 1.391(19) | C20  | C13  | 1.48(2)   |
| N2   | C9   | 1.385(17) | C21  | C22  | 1.350(19) |
| N2   | C12  | 1.400(19) | C21  | H21  | 0.9301    |
| C1   | C2   | 1.413(19) | C22  | H22  | 0.9300    |
| C1   | C22  | 1.425(19) | P1   | O2   | 1.502(11) |
| C2   | C9   | 1.48(2)   | P1   | O3   | 1.544(11) |
| C2   | C3   | 1.50(2)   | P1   | O1   | 1.560(11) |
| C3   | C8   | 1.37(2)   | O1   | Zn1  | 1.729(9)  |
| C3   | C4   | 1.400(19) | O2   | Zn1  | 1.766(9)  |
| C4   | C5   | 1.39(2)   | O3   | H3   | 0.8200    |
| C4   | H4   | 0.9300    | P2   | O5   | 1.488(11) |
| C5   | C6   | 1.43(2)   | P2   | O4   | 1.510(11) |

|     |     |           |     |      |           |
|-----|-----|-----------|-----|------|-----------|
| C5  | H5  | 0.9300    | P2  | O6   | 1.551(10) |
| C6  | C7  | 1.358(19) | O4  | Zn1  | 1.651(10) |
| C6  | P1  | 1.770(14) | O5  | Zn1  | 1.747(10) |
| C7  | C8  | 1.419(19) | O6  | H6   | 0.8200    |
| C7  | H7  | 0.9300    | Zn1 | O1   | 1.729(9)  |
| C8  | H8  | 0.9300    | Zn1 | O5   | 1.747(10) |
| C9  | C10 | 1.49(2)   | Zn1 | O2   | 1.766(9)  |
| C10 | C11 | 1.355(19) | C23 | N3   | 1.458(19) |
| C10 | H10 | 0.9300    | C23 | H23A | 0.9600    |
| C11 | C12 | 1.427(18) | C23 | H23B | 0.9600    |
| C11 | H11 | 0.9299    | C23 | H23C | 0.9601    |
| C12 | C13 | 1.394(19) | N3  | C24  | 1.333(18) |
| C13 | C20 | 1.48(2)   | N3  | C25  | 1.450(19) |
| C13 | C14 | 1.50(2)   | C24 | O7   | 1.282(16) |
| C14 | C19 | 1.38(2)   | C24 | H24  | 0.9300    |
| C14 | C15 | 1.41(2)   | C25 | H25A | 0.9600    |
| C15 | C16 | 1.366(19) | C25 | H25B | 0.9600    |
| C15 | H15 | 0.9300    | C25 | H25C | 0.9599    |
| C16 | C17 | 1.43(2)   | O8  | H81  | 0.8569    |
| C16 | H16 | 0.9300    | O8  | H82  | 0.8506    |
| C17 | C18 | 1.39(2)   |     |      |           |

**Table S3.** Bond angles in **IPCE-1Pd**.

| Atom | Atom | Atom | Angle/°    | Atom | Atom | Atom | Angle/°   |
|------|------|------|------------|------|------|------|-----------|
| N2   | Pd1  | N2   | 180.000(2) | C18  | C17  | C16  | 115.3(12) |
| N2   | Pd1  | N1   | 90.3(4)    | C18  | C17  | P2   | 131.6(12) |
| N2   | Pd1  | N1   | 89.7(4)    | C16  | C17  | P2   | 112.7(10) |
| N2   | Pd1  | N1   | 89.7(4)    | C19  | C18  | C17  | 122.4(14) |
| N2   | Pd1  | N1   | 90.3(4)    | C19  | C18  | H18  | 118.8     |
| N1   | Pd1  | N1   | 180.0(5)   | C17  | C18  | H18  | 118.8     |
| C1   | N1   | C20  | 102.8(11)  | C14  | C19  | C18  | 121.2(13) |
| C1   | N1   | Pd1  | 129.4(9)   | C14  | C19  | H19  | 119.4     |
| C20  | N1   | Pd1  | 127.6(9)   | C18  | C19  | H19  | 119.4     |
| C9   | N2   | C12  | 105.5(10)  | N1   | C20  | C21  | 111.3(12) |
| C9   | N2   | Pd1  | 126.3(9)   | N1   | C20  | C13  | 124.4(12) |
| C12  | N2   | Pd1  | 128.2(8)   | C21  | C20  | C13  | 123.2(13) |
| N1   | C1   | C2   | 123.3(13)  | C22  | C21  | C20  | 106.9(12) |
| N1   | C1   | C22  | 112.6(12)  | C22  | C21  | H21  | 126.6     |
| C2   | C1   | C22  | 124.0(12)  | C20  | C21  | H21  | 126.6     |

|     |     |     |           |      |     |      |           |
|-----|-----|-----|-----------|------|-----|------|-----------|
| C1  | C2  | C9  | 124.9(13) | C21  | C22 | C1   | 105.9(12) |
| C1  | C2  | C3  | 118.2(12) | C21  | C22 | H22  | 127.1     |
| C9  | C2  | C3  | 116.2(11) | C1   | C22 | H22  | 127.1     |
| C8  | C3  | C4  | 117.7(12) | O2   | P1  | O3   | 113.6(7)  |
| C8  | C3  | C2  | 121.2(12) | O2   | P1  | O1   | 112.4(6)  |
| C4  | C3  | C2  | 120.7(13) | O3   | P1  | O1   | 107.2(6)  |
| C5  | C4  | C3  | 121.4(14) | O2   | P1  | C6   | 111.2(6)  |
| C5  | C4  | H4  | 119.3     | O3   | P1  | C6   | 104.4(6)  |
| C3  | C4  | H4  | 119.3     | O1   | P1  | C6   | 107.5(7)  |
| C4  | C5  | C6  | 120.2(13) | P1   | O1  | Zn1  | 143.3(7)  |
| C4  | C5  | H5  | 119.9     | P1   | O2  | Zn1  | 153.7(6)  |
| C6  | C5  | H5  | 119.9     | P1   | O3  | H3   | 109.5     |
| C7  | C6  | C5  | 117.8(13) | O5   | P2  | O4   | 113.4(6)  |
| C7  | C6  | P1  | 126.4(11) | O5   | P2  | O6   | 112.3(6)  |
| C5  | C6  | P1  | 113.8(10) | O4   | P2  | O6   | 111.0(6)  |
| C6  | C7  | C8  | 120.8(14) | O5   | P2  | C17  | 107.9(7)  |
| C6  | C7  | H7  | 119.6     | O4   | P2  | C17  | 108.1(7)  |
| C8  | C7  | H7  | 119.6     | O6   | P2  | C17  | 103.5(6)  |
| C3  | C8  | C7  | 121.3(13) | P2   | O4  | Zn1  | 136.1(6)  |
| C3  | C8  | H8  | 119.3     | P2   | O5  | Zn1  | 165.1(7)  |
| C7  | C8  | H8  | 119.3     | P2   | O6  | H6   | 109.5     |
| N2  | C9  | C2  | 125.6(12) | O4   | Zn1 | O1   | 101.1(5)  |
| N2  | C9  | C10 | 107.1(11) | O4   | Zn1 | O5   | 112.8(5)  |
| C2  | C9  | C10 | 126.8(12) | O1   | Zn1 | O5   | 94.4(5)   |
| C11 | C10 | C9  | 109.3(12) | O4   | Zn1 | O2   | 131.4(5)  |
| C11 | C10 | H10 | 125.3     | O1   | Zn1 | O2   | 111.1(4)  |
| C9  | C10 | H10 | 125.3     | O5   | Zn1 | O2   | 100.3(5)  |
| C10 | C11 | C12 | 105.0(12) | N3   | C23 | H23A | 109.5     |
| C10 | C11 | H11 | 127.5     | N3   | C23 | H23B | 109.5     |
| C12 | C11 | H11 | 127.5     | H23A | C23 | H23B | 109.5     |
| C13 | C12 | N2  | 126.3(12) | N3   | C23 | H23C | 109.5     |
| C13 | C12 | C11 | 120.9(13) | H23A | C23 | H23C | 109.5     |
| N2  | C12 | C11 | 112.1(11) | H23B | C23 | H23C | 109.5     |
| C12 | C13 | C20 | 123.3(13) | C24  | N3  | C25  | 119.4(12) |
| C12 | C13 | C14 | 118.1(12) | C24  | N3  | C23  | 122.0(12) |
| C20 | C13 | C14 | 118.1(12) | C25  | N3  | C23  | 117.6(11) |
| C19 | C14 | C15 | 118.0(13) | O7   | C24 | N3   | 118.8(12) |
| C19 | C14 | C13 | 123.6(13) | O7   | C24 | H24  | 120.6     |
| C15 | C14 | C13 | 118.3(13) | N3   | C24 | H24  | 120.6     |

|     |     |     |           |      |     |      |       |
|-----|-----|-----|-----------|------|-----|------|-------|
| C16 | C15 | C14 | 120.5(14) | N3   | C25 | H25A | 109.5 |
| C16 | C15 | H15 | 119.7     | N3   | C25 | H25B | 109.5 |
| C14 | C15 | H15 | 119.7     | H25A | C25 | H25B | 109.5 |
| C15 | C16 | C17 | 122.3(13) | N3   | C25 | H25C | 109.5 |
| C15 | C16 | H16 | 118.8     | H25A | C25 | H25C | 109.5 |
| C17 | C16 | H16 | 118.8     | H25B | C25 | H25C | 109.5 |
|     |     |     |           | H81  | O8  | H82  | 109.4 |

**Table S4.** Hydrogen bonds in **IPCE-1Pd**.

| D  | H   | A  | d(D-H)/Å | d(H-A)/Å | d(D-A)/Å  | D-H-A/° |
|----|-----|----|----------|----------|-----------|---------|
| O3 | H3  | O4 | 0.82     | 1.92     | 2.711(13) | 161     |
| O6 | H6  | O7 | 0.82     | 2.29     | 3.065(13) | 159     |
| O8 | H81 | O3 | 0.85     | 2.45     | 2.85(2)   | 110     |

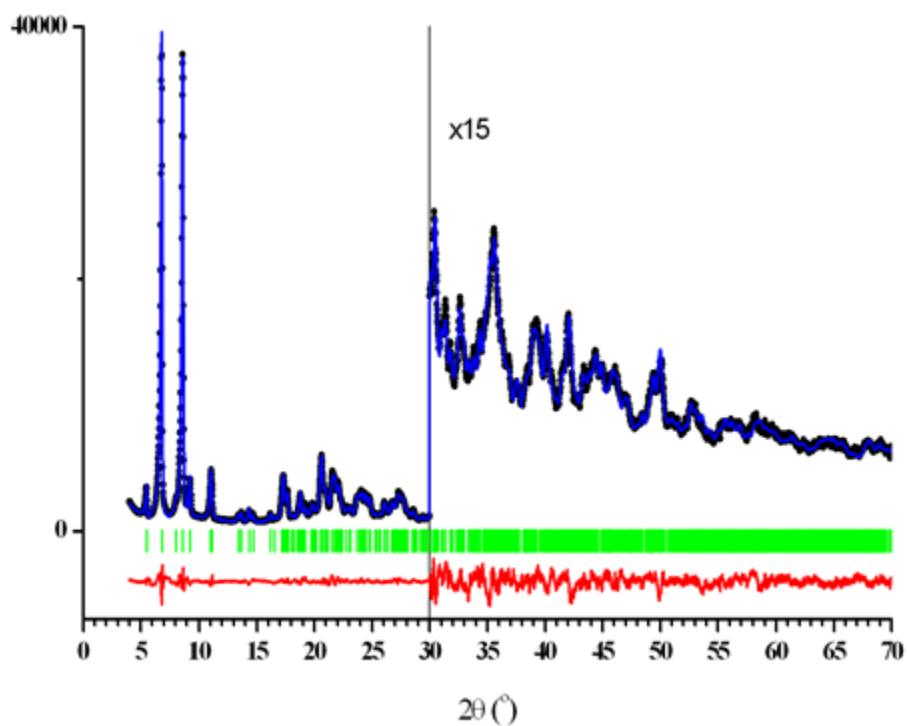

**Figure S2.** The Rietveld plot for **IPCE-1Pd** showing the experimental (black dots), calculated (blue) and difference (red) curves. The vertical green bars denote calculated positions of the diffraction peaks.

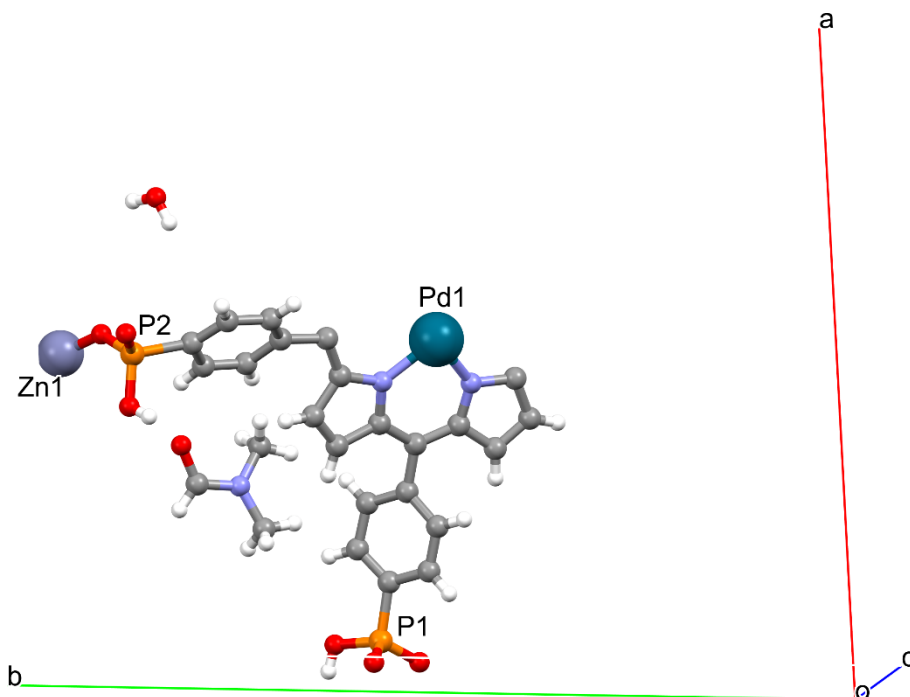

**Figure S3.** Asymmetric unit of **IPCE-1Pd**. (Pd: dark blue spheres, C: gray spheres, O: red spheres, N: blue spheres, P: orange spheres, H: white spheres).

Each of the four phosphonate groups is monodeprotonated and binds two zinc cations in the monodentate mode (**Figures S4, S5**). The P–O distances of the phosphonate groups of Pd-H<sub>4</sub>TPPP<sup>4-</sup> are within 1.488(11)–1.560(11) Å. The Zn(II) cations have tetrahedral coordination environment provided by binding with four phosphonate oxygen atoms [O1, O2, O4 and O5] from four palladium(II) porphyrinates, with the Zn–O bond lengths varying in range of 1.651(10)–1.766(9) Å and O–Zn–O angles ranging from 94.4(5)° to 131.4(5)°.

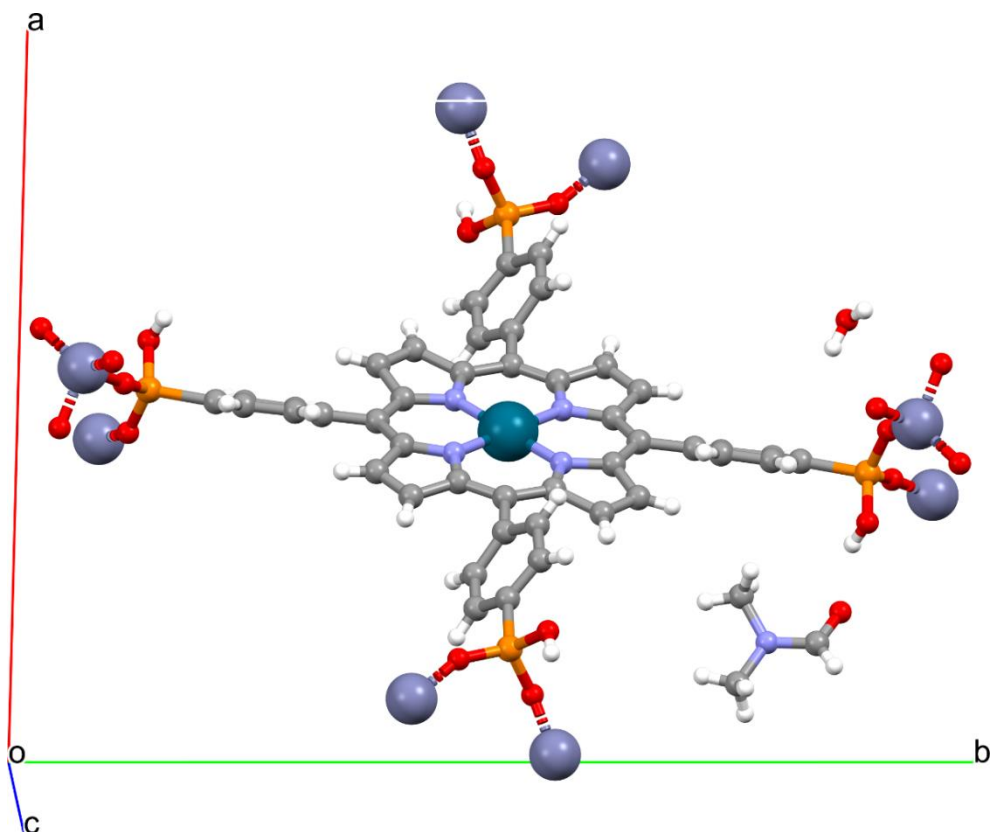

**Figure S4.** Coordination environment of palladium(II) porphyrinate in **IPCE-1Pd**.

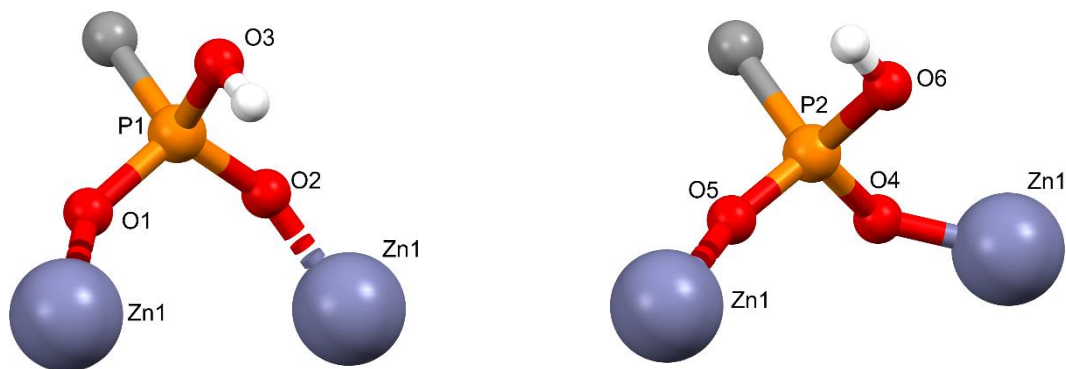

**Figure S5.** Graphical representation of the coordination modes of coordinated phosphonate groups in **IPCE-1Pd**.

Predictably, the smallest moiety of the secondary building unit of this MOF is a dimer formed by the interconnection of two nearest zinc atoms through two bridging phosphonate groups from different porphyrins [P1, O1, O2, O3] with the Zn $\cdots$ Zn distance of 4.450(5) Å, that is close to this binding mode in other MOFs based on porphyrinylphosphonates (**Figure S6**).<sup>1-3</sup>



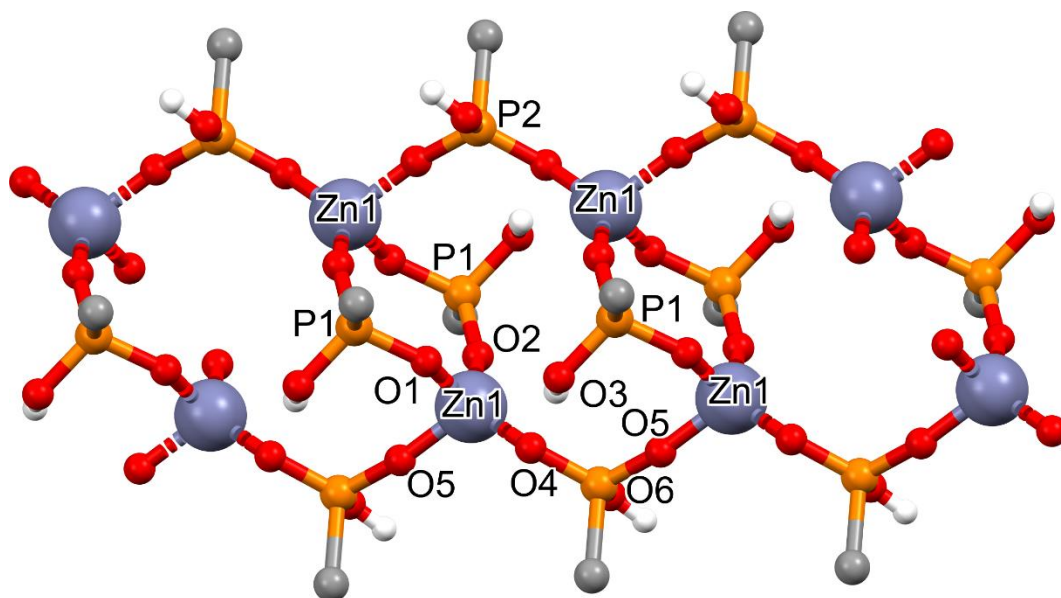

**Figure S6.** Graphical representation of the inorganic layer in the structure of **IPCE-1Pd**.

Further, the bonding of two dimers by two phosphonates [P2, O4, O5, O6] leads to the formation of a 1D inorganic layer, which is strengthened by the formation of strong intermolecular hydrogen bonds between oxygen atoms of neighboring porphyrin molecules (the O3...O4 distance is 2.711(13) Å).

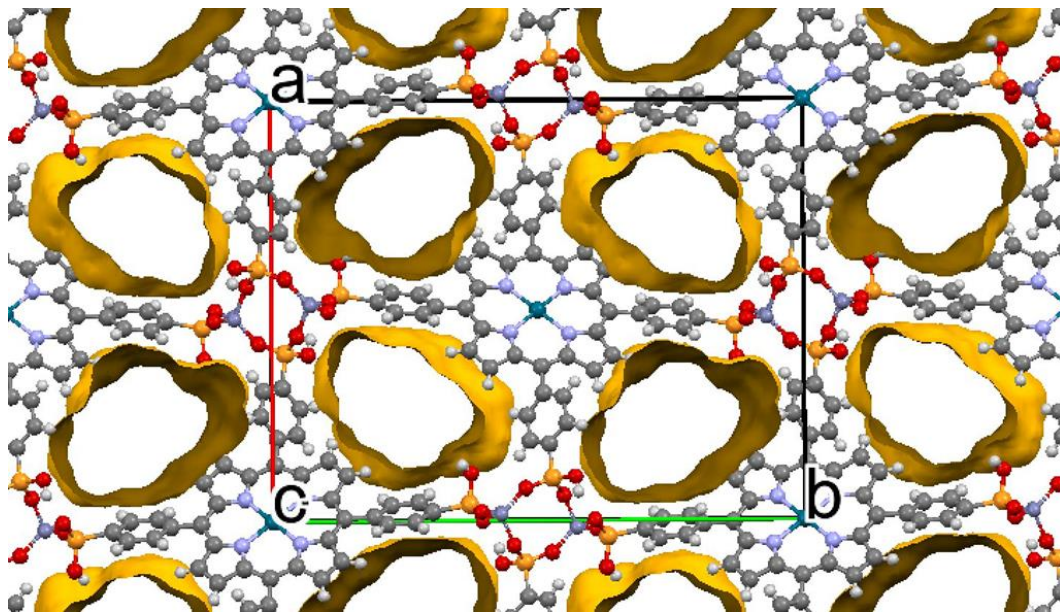

**Figure S7.** Channels in **IPCE-1Pd** viewed along the *c* axis. *dmf* and water molecules situated in the channels are not shown for clarity.

**Structural characterization of IPCE-1Pd\_Im****Table S5.** Crystal data and structure refinement for **IPCE-1Pd\_Im**.

|                                                   |                                                                                                                                                                                                |
|---------------------------------------------------|------------------------------------------------------------------------------------------------------------------------------------------------------------------------------------------------|
| Identification code                               | <b>IPCE-1Pd_Im</b>                                                                                                                                                                             |
| CCDC number                                       | 2212074                                                                                                                                                                                        |
| Empirical formula                                 | $[\text{C}_{62}\text{H}_{53}\text{N}_{16}\text{O}_{12}\text{P}_4\text{PdZn}_2]^+ \cdot \text{C}_3\text{H}_3\text{N}_2^- \cdot 0.6(\text{C}_3\text{H}_4\text{N}_2) \cdot 2.2\text{H}_2\text{O}$ |
| Formula weight                                    | 1720.56                                                                                                                                                                                        |
| Wavelength, Å                                     | 1.5418                                                                                                                                                                                         |
| Crystal system                                    | monoclinic                                                                                                                                                                                     |
| Space group                                       | C2/c                                                                                                                                                                                           |
| a, Å                                              | 19.1484(17)                                                                                                                                                                                    |
| b, Å                                              | 34.587(2)                                                                                                                                                                                      |
| c, Å                                              | 12.4658(12)                                                                                                                                                                                    |
| $\beta$ , °                                       | 120.124(19)                                                                                                                                                                                    |
| Volume, Å <sup>3</sup>                            | 7140.9(15)                                                                                                                                                                                     |
| Z                                                 | 4                                                                                                                                                                                              |
| Dx, g cm <sup>-3</sup>                            | 1.600                                                                                                                                                                                          |
| 2 $\theta$ min – 2 $\theta$ max, increment, °     | 4.508 – 70.009, 0.017                                                                                                                                                                          |
| No. params/restraints                             | 220/240                                                                                                                                                                                        |
| R <sub>p</sub> /R <sub>wp</sub> /R <sub>exp</sub> | 0.0227/0.0328/0.0130                                                                                                                                                                           |
| goodness-of-fit                                   | 2.521                                                                                                                                                                                          |

**Table S6.** Bond lengths in **IPCE-1Pd\_Im**.

| Atom | Atom | Length/Å  | Atom | Atom | Length/Å  |
|------|------|-----------|------|------|-----------|
| Pd1  | N1   | 2.021(9)  | O2   | H2   | 0.8200    |
| Pd1  | N1   | 2.021(9)  | O3   | H3   | 0.8200    |
| Pd1  | N2   | 2.069(8)  | P2   | O4   | 1.500(9)  |
| Pd1  | N2   | 2.069(8)  | P2   | O5   | 1.512(9)  |
| N1   | C1   | 1.368(15) | P2   | O6   | 1.562(11) |
| N1   | C20  | 1.374(11) | O5   | H5A  | 0.8200    |
| N2   | C12  | 1.372(11) | O6   | H6   | 0.8200    |
| N2   | C9   | 1.397(16) | Zn1  | N5   | 1.942(8)  |
| C1   | C2   | 1.384(12) | Zn1  | N3   | 1.990(10) |
| C1   | C22  | 1.471(14) | Zn1  | N7   | 2.030(10) |
| C2   | C9   | 1.425(14) | N3   | C23  | 1.327(15) |
| C2   | C3   | 1.513(17) | N3   | C25  | 1.396(16) |
| C3   | C8   | 1.372(16) | C23  | N4   | 1.310(16) |
| C3   | C4   | 1.394(17) | C23  | H23  | 0.9300    |
| C4   | C5   | 1.408(15) | N4   | C24  | 1.414(15) |
| C4   | H4   | 0.9300    | N4   | H4A  | 0.8599    |

|     |     |           |     |      |           |
|-----|-----|-----------|-----|------|-----------|
| C5  | C6  | 1.382(17) | C24 | C25  | 1.360(17) |
| C5  | H5  | 0.9300    | C24 | H24  | 0.9299    |
| C6  | C7  | 1.391(17) | C25 | H25  | 0.9300    |
| C6  | P1  | 1.804(13) | N5  | C26  | 1.340(15) |
| C7  | C8  | 1.425(15) | N5  | C28  | 1.395(18) |
| C7  | H7  | 0.9300    | C26 | N6   | 1.320(15) |
| C8  | H8  | 0.9300    | C26 | H26  | 0.9300    |
| C9  | C10 | 1.470(13) | N6  | C27  | 1.356(18) |
| C10 | C11 | 1.326(15) | C27 | C28  | 1.312(14) |
| C10 | H10 | 0.9300    | C27 | H27  | 0.9300    |
| C11 | C12 | 1.451(14) | C28 | H28  | 0.9300    |
| C11 | H11 | 0.9300    | N7  | C29  | 1.312(19) |
| C12 | C13 | 1.393(15) | N7  | C31  | 1.339(13) |
| C13 | C20 | 1.414(15) | C29 | N8   | 1.364(16) |
| C13 | C14 | 1.518(11) | C29 | H29  | 0.9300    |
| C14 | C19 | 1.376(18) | N8  | C30  | 1.377(13) |
| C14 | C15 | 1.396(17) | N8  | H8A  | 0.8600    |
| C15 | C16 | 1.391(12) | C30 | C31  | 1.332(18) |
| C15 | H15 | 0.9300    | C30 | H30  | 0.9300    |
| C16 | C17 | 1.388(18) | C31 | H31  | 0.9300    |
| C16 | H16 | 0.9300    | C32 | N9   | 1.327(12) |
| C17 | C18 | 1.358(18) | C32 | N9   | 1.327(12) |
| C17 | P2  | 1.814(9)  | C32 | H32  | 0.9300    |
| C18 | C19 | 1.411(12) | N9  | C33  | 1.392(13) |
| C18 | H18 | 0.9300    | C33 | C33  | 1.45(2)   |
| C19 | H19 | 0.9300    | C33 | H33  | 0.9300    |
| C20 | C13 | 1.414(15) | N10 | C34  | 1.33(4)   |
| C20 | C21 | 1.495(16) | N10 | C36  | 1.36(5)   |
| C21 | C22 | 1.319(14) | N10 | H10A | 0.8599    |
| C21 | H21 | 0.9300    | C34 | N11  | 1.29(6)   |
| C22 | H22 | 0.9300    | C34 | H34  | 0.9297    |
| P1  | O2  | 1.490(7)  | N11 | C35  | 1.38(4)   |
| P1  | O1  | 1.521(10) | C35 | C36  | 1.35(6)   |
| P1  | O3  | 1.542(8)  | C35 | H35  | 0.9297    |
| O1  | Zn1 | 1.942(8)  | C36 | H36  | 0.9298    |

**Table S7.** Bond angles in **IPCE-1Pd\_Im**.

| Atom | Atom | Atom | Angle/°  | Atom | Atom | Atom | Angle/°  |
|------|------|------|----------|------|------|------|----------|
| N1   | Pd1  | N1   | 180.0(3) | O1   | P1   | C6   | 103.9(5) |
| N1   | Pd1  | N2   | 93.0(3)  | O3   | P1   | C6   | 106.8(4) |

|     |     |     |           |     |     |     |           |
|-----|-----|-----|-----------|-----|-----|-----|-----------|
| N1  | Pd1 | N2  | 87.0(3)   | P1  | O1  | Zn1 | 144.9(4)  |
| N1  | Pd1 | N2  | 87.0(3)   | P1  | O2  | H2  | 109.5     |
| N1  | Pd1 | N2  | 93.0(3)   | P1  | O3  | H3  | 109.5     |
| N2  | Pd1 | N2  | 180.0(6)  | O4  | P2  | O5  | 112.0(5)  |
| C1  | N1  | C20 | 107.7(9)  | O4  | P2  | O6  | 108.3(5)  |
| C1  | N1  | Pd1 | 128.0(5)  | O5  | P2  | O6  | 108.9(5)  |
| C20 | N1  | Pd1 | 124.3(8)  | O4  | P2  | C17 | 107.2(5)  |
| C12 | N2  | C9  | 105.4(8)  | O5  | P2  | C17 | 116.5(5)  |
| C12 | N2  | Pd1 | 123.7(7)  | O6  | P2  | C17 | 103.5(5)  |
| C9  | N2  | Pd1 | 130.3(6)  | P2  | O5  | H5A | 109.5     |
| N1  | C1  | C2  | 128.7(9)  | P2  | O6  | H6  | 109.5     |
| N1  | C1  | C22 | 109.0(7)  | N5  | Zn1 | O1  | 112.8(4)  |
| C2  | C1  | C22 | 122.1(11) | N5  | Zn1 | N3  | 112.2(3)  |
| C1  | C2  | C9  | 123.1(11) | O1  | Zn1 | N3  | 107.2(4)  |
| C1  | C2  | C3  | 118.6(9)  | N5  | Zn1 | N7  | 106.6(4)  |
| C9  | C2  | C3  | 117.2(9)  | O1  | Zn1 | N7  | 111.1(3)  |
| C8  | C3  | C4  | 118.6(11) | N3  | Zn1 | N7  | 106.7(4)  |
| C8  | C3  | C2  | 122.3(11) | C23 | N3  | C25 | 106.7(10) |
| C4  | C3  | C2  | 118.8(10) | C23 | N3  | Zn1 | 130.4(9)  |
| C3  | C4  | C5  | 121.5(11) | C25 | N3  | Zn1 | 122.7(8)  |
| C3  | C4  | H4  | 119.3     | N4  | C23 | N3  | 111.1(11) |
| C5  | C4  | H4  | 119.3     | N4  | C23 | H23 | 124.4     |
| C6  | C5  | C4  | 119.8(12) | N3  | C23 | H23 | 124.4     |
| C6  | C5  | H5  | 120.1     | C23 | N4  | C24 | 108.3(10) |
| C4  | C5  | H5  | 120.1     | C23 | N4  | H4A | 125.9     |
| C5  | C6  | C7  | 119.3(11) | C24 | N4  | H4A | 125.9     |
| C5  | C6  | P1  | 119.7(9)  | C25 | C24 | N4  | 105.2(10) |
| C7  | C6  | P1  | 121.0(9)  | C25 | C24 | H24 | 127.4     |
| C6  | C7  | C8  | 120.3(11) | N4  | C24 | H24 | 127.4     |
| C6  | C7  | H7  | 119.8     | C24 | C25 | N3  | 108.3(11) |
| C8  | C7  | H7  | 119.8     | C24 | C25 | H25 | 125.9     |
| C3  | C8  | C7  | 120.4(11) | N3  | C25 | H25 | 125.9     |
| C3  | C8  | H8  | 119.8     | C26 | N5  | C28 | 103.5(9)  |
| C7  | C8  | H8  | 119.8     | C26 | N5  | Zn1 | 131.0(9)  |
| N2  | C9  | C2  | 122.2(9)  | C28 | N5  | Zn1 | 124.6(7)  |
| N2  | C9  | C10 | 108.5(9)  | N6  | C26 | N5  | 111.2(12) |
| C2  | C9  | C10 | 129.3(11) | N6  | C26 | H26 | 124.4     |
| C11 | C10 | C9  | 108.1(10) | N5  | C26 | H26 | 124.4     |
| C11 | C10 | H10 | 126.0     | C26 | N6  | C27 | 106.9(10) |
| C9  | C10 | H10 | 126.0     | C28 | C27 | N6  | 107.4(11) |
| C10 | C11 | C12 | 106.8(8)  | C28 | C27 | H27 | 126.3     |

|     |     |     |           |     |     |      |           |
|-----|-----|-----|-----------|-----|-----|------|-----------|
| C10 | C11 | H11 | 126.6     | N6  | C27 | H27  | 126.3     |
| C12 | C11 | H11 | 126.6     | C27 | C28 | N5   | 108.9(12) |
| N2  | C12 | C13 | 125.4(9)  | C27 | C28 | H28  | 125.6     |
| N2  | C12 | C11 | 111.0(9)  | N5  | C28 | H28  | 125.6     |
| C13 | C12 | C11 | 123.5(8)  | C29 | N7  | C31  | 102.0(10) |
| C12 | C13 | C20 | 127.4(9)  | C29 | N7  | Zn1  | 129.6(7)  |
| C12 | C13 | C14 | 116.5(9)  | C31 | N7  | Zn1  | 127.1(9)  |
| C20 | C13 | C14 | 114.7(9)  | N7  | C29 | N8   | 111.3(9)  |
| C19 | C14 | C15 | 119.7(8)  | N7  | C29 | H29  | 124.3     |
| C19 | C14 | C13 | 121.4(10) | N8  | C29 | H29  | 124.3     |
| C15 | C14 | C13 | 118.4(11) | C29 | N8  | C30  | 107.3(11) |
| C16 | C15 | C14 | 120.7(12) | C29 | N8  | H8A  | 126.3     |
| C16 | C15 | H15 | 119.6     | C30 | N8  | H8A  | 126.3     |
| C14 | C15 | H15 | 119.6     | C31 | C30 | N8   | 101.2(8)  |
| C17 | C16 | C15 | 118.8(11) | C31 | C30 | H30  | 129.4     |
| C17 | C16 | H16 | 120.6     | N8  | C30 | H30  | 129.4     |
| C15 | C16 | H16 | 120.6     | C30 | C31 | N7   | 115.2(11) |
| C18 | C17 | C16 | 120.9(8)  | C30 | C31 | H31  | 122.4     |
| C18 | C17 | P2  | 121.6(10) | N7  | C31 | H31  | 122.4     |
| C16 | C17 | P2  | 117.2(9)  | N9  | C32 | N9   | 110.4(14) |
| C17 | C18 | C19 | 120.6(12) | N9  | C32 | H32  | 124.8     |
| C17 | C18 | H18 | 119.7     | N9  | C32 | H32  | 124.8     |
| C19 | C18 | H18 | 119.7     | C32 | N9  | C33  | 109.2(9)  |
| C14 | C19 | C18 | 119.2(11) | N9  | C33 | C33  | 104.9(6)  |
| C14 | C19 | H19 | 120.4     | N9  | C33 | H33  | 127.6     |
| C18 | C19 | H19 | 120.4     | C33 | C33 | H33  | 127.6     |
| N1  | C20 | C13 | 125.9(10) | C34 | N10 | C36  | 107(3)    |
| N1  | C20 | C21 | 108.1(9)  | C34 | N10 | H10A | 126.3     |
| C13 | C20 | C21 | 125.9(8)  | C36 | N10 | H10A | 126.3     |
| C22 | C21 | C20 | 107.2(8)  | N11 | C34 | N10  | 112(3)    |
| C22 | C21 | H21 | 126.4     | N11 | C34 | H34  | 124.0     |
| C20 | C21 | H21 | 126.4     | N10 | C34 | H34  | 124.0     |
| C21 | C22 | C1  | 108.0(10) | C34 | N11 | C35  | 106(3)    |
| C21 | C22 | H22 | 126.0     | C36 | C35 | N11  | 108(4)    |
| C1  | C22 | H22 | 126.0     | C36 | C35 | H35  | 125.8     |
| O2  | P1  | O1  | 113.5(4)  | N11 | C35 | H35  | 125.8     |
| O2  | P1  | O3  | 111.0(5)  | C35 | C36 | N10  | 106(3)    |
| O1  | P1  | O3  | 111.0(4)  | C35 | C36 | H36  | 127.0     |
| O2  | P1  | C6  | 110.3(5)  | N10 | C36 | H36  | 127.0     |

**Table S8.** Hydrogen bonds in **IPCE-1Pd\_Im**.

| D  | H   | A   | d(D-H)/Å | d(H-A)/Å | d(D-A)/Å  | D-H-A/° |
|----|-----|-----|----------|----------|-----------|---------|
| N4 | H4A | O4  | 0.86     | 2.01     | 2.785(13) | 149.00  |
| O2 | H2  | O3  | 0.82     | 2.25     | 2.562(10) | 103.00  |
| O3 | H3  | N6  | 0.82     | 2.32     | 3.120(11) | 166.00  |
| O5 | H5A | O5  | 0.82     | 1.70     | 2.473(10) | 157.00  |
| O6 | H6  | N9  | 0.82     | 2.04     | 2.845(9)  | 167.00  |
| N8 | H8A | O1W | 0.86     | 2.34     | 2.697(13) | 105.00  |

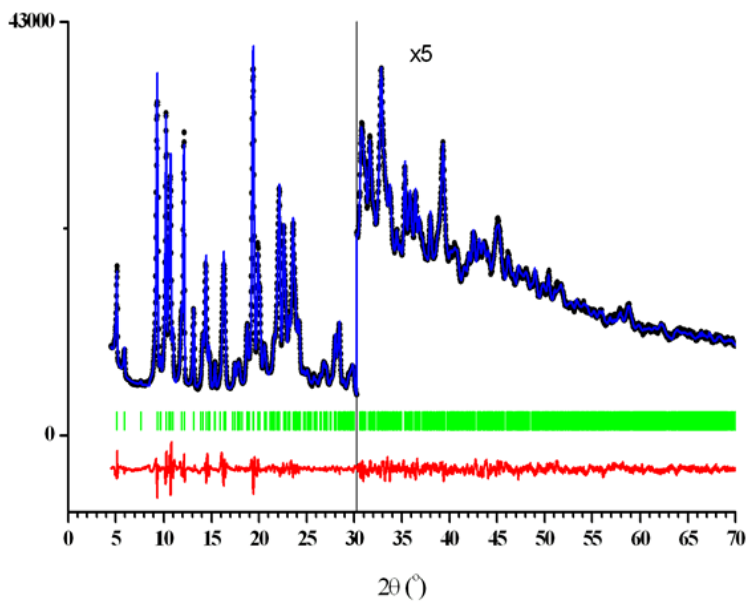

**Figure S8.** The Rietveld plot for **IPCE-1Pd\_Im** showing the experimental (black dots), calculated (blue) and difference (red) curves. The vertical green bars denote calculated positions of the diffraction peaks.

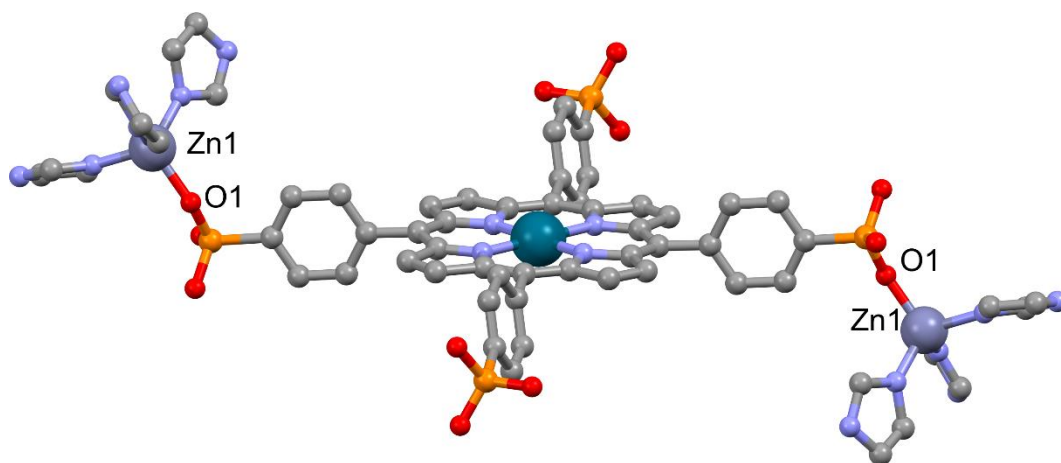

**Figure S9.** Coordination environment of palladium(II) porphyrinate in **IPCE-1Pd\_Im**. Hydrogen atoms are omitted for clarity.

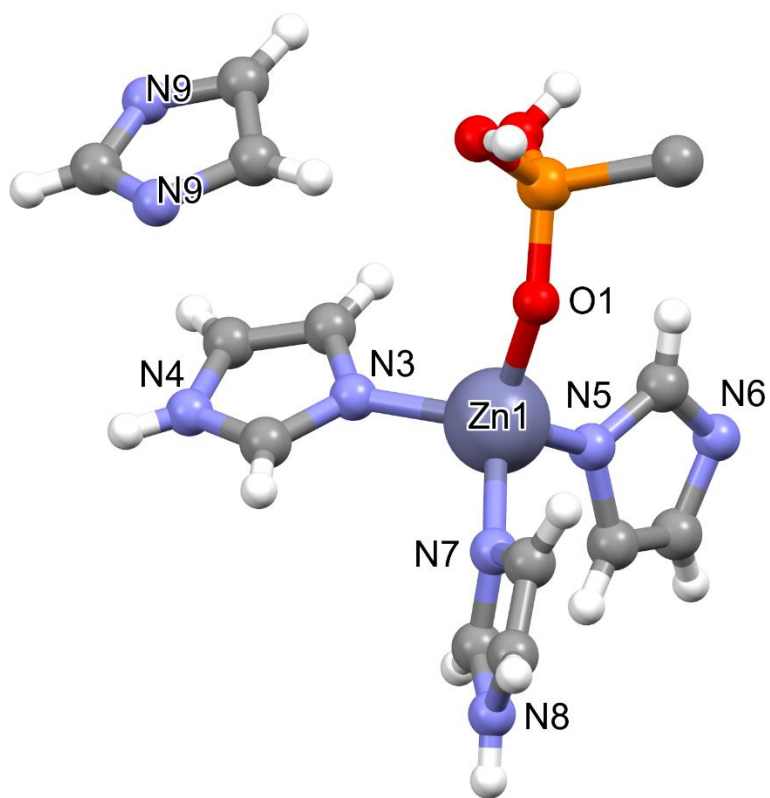

**Figure S10.** Graphical representation of zinc(II) coordination environment in **IPCE-1Pd\_Im**.

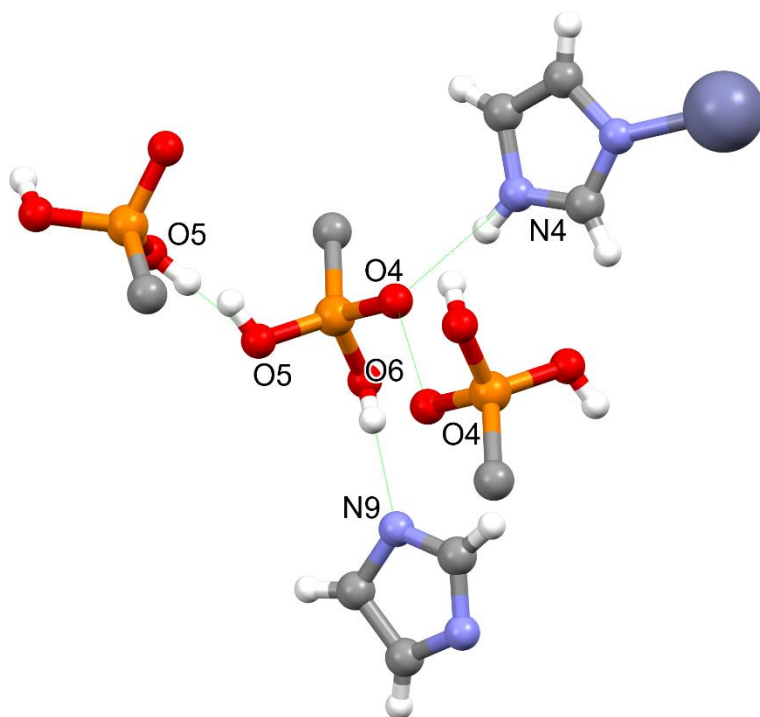

**Figure S11.** Graphical representation of hydrogen bonds of coordinatively free phosphonate groups of Pd-H<sub>7</sub>TPPP<sup>-</sup> in **IPCE-1Pd\_Im**.

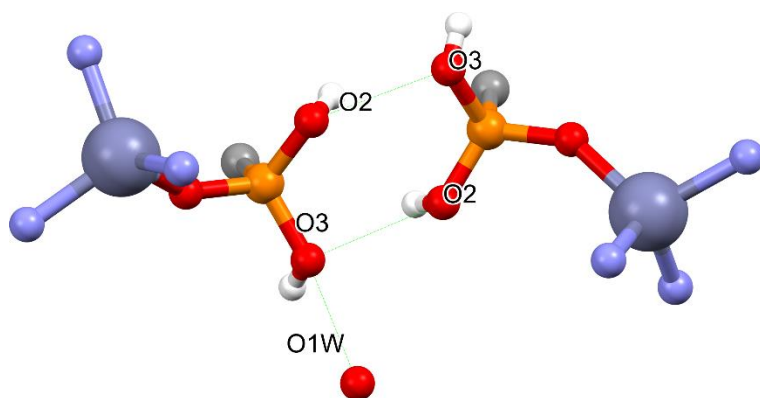

**Figure S12.** Graphical representation of hydrogen bonds of coordinated phosphonate groups of Pd-H<sub>7</sub>TPPP<sup>-</sup> in **IPCE-1Pd\_Im**.



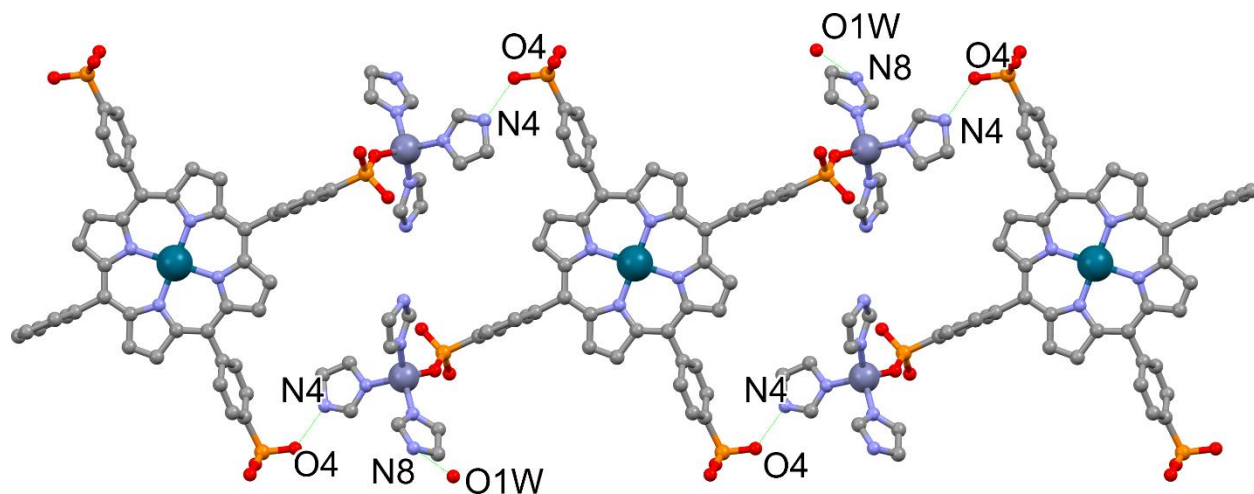

**Figure S13.** Graphical representation of hydrogen bonds of coordinated imidazole molecules in IPCE-1Pd\_Im.

#### SEM and EDX data of IPCE-1Pd

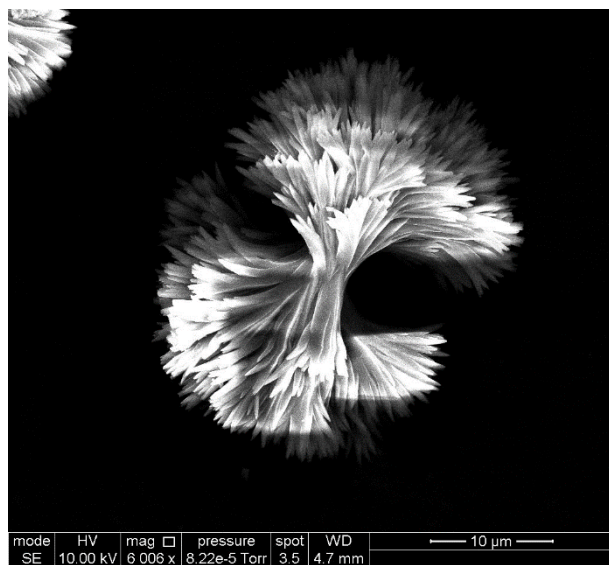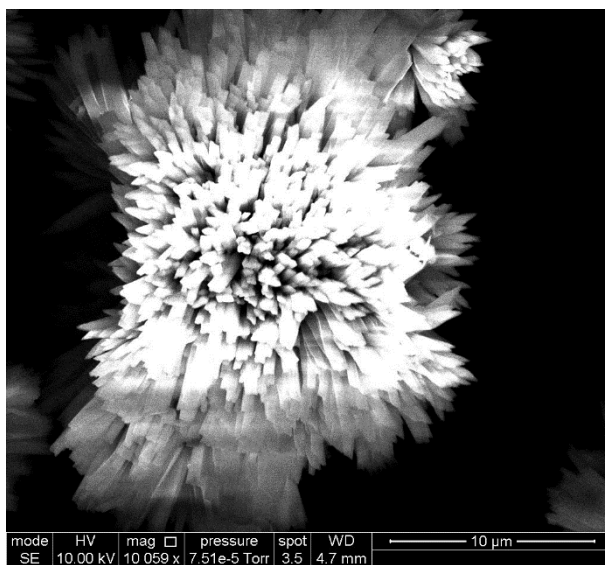

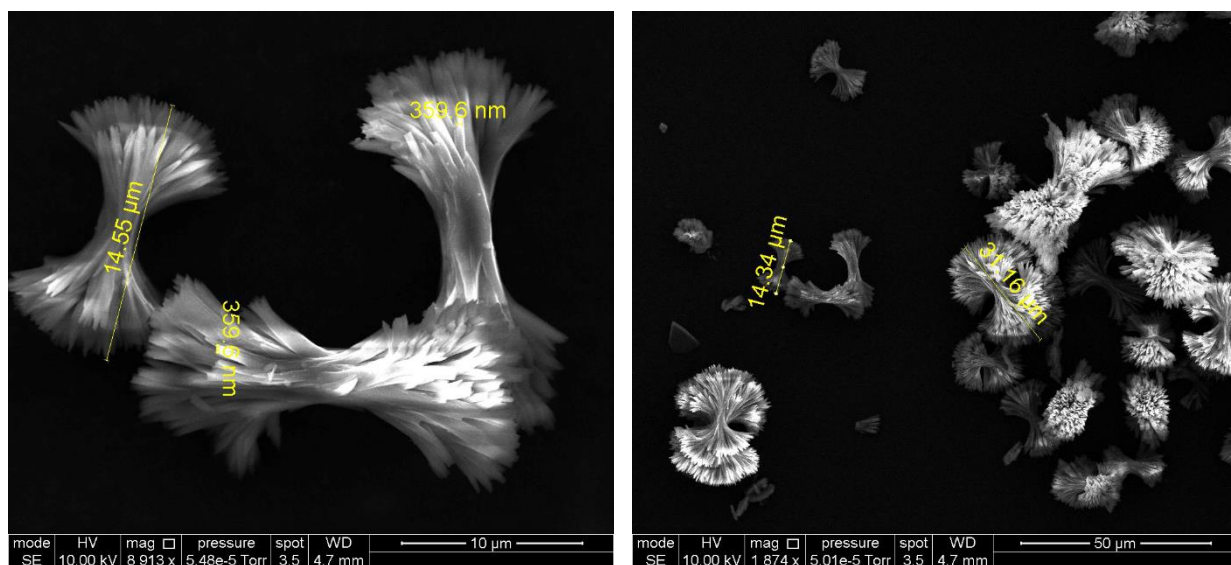

**Figure S14.** SEM images of dried sample of IPCE-1Pd.

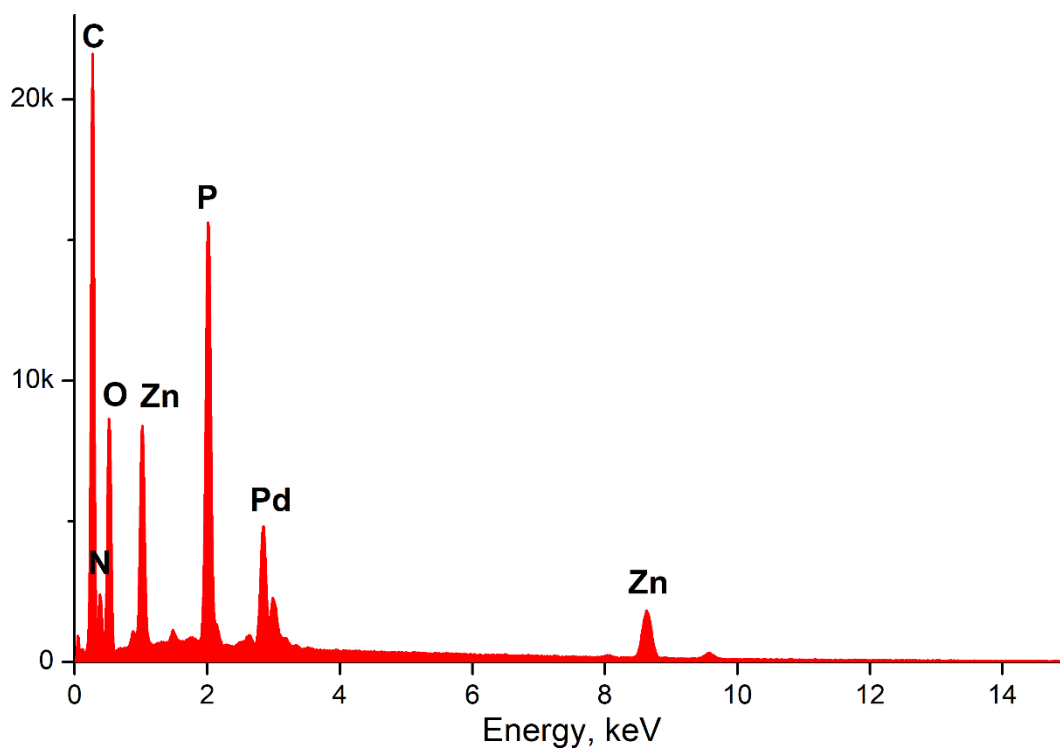

**Figure S15.** EDX spectrum of IPCE-1Pd.

**Table S9.** Elemental analysis of **IPCE-1Pd** based on EDS spectroscopy data.

| Element | C     | N     | O     | P     | Pd    | Zn    |
|---------|-------|-------|-------|-------|-------|-------|
| Wt, %   | 50.70 | 09.82 | 21.23 | 06.09 | 05.35 | 06.81 |
| At, %   | 63.96 | 10.62 | 20.11 | 02.98 | 00.76 | 01.58 |

**XPS data of IPCE-1Pd**

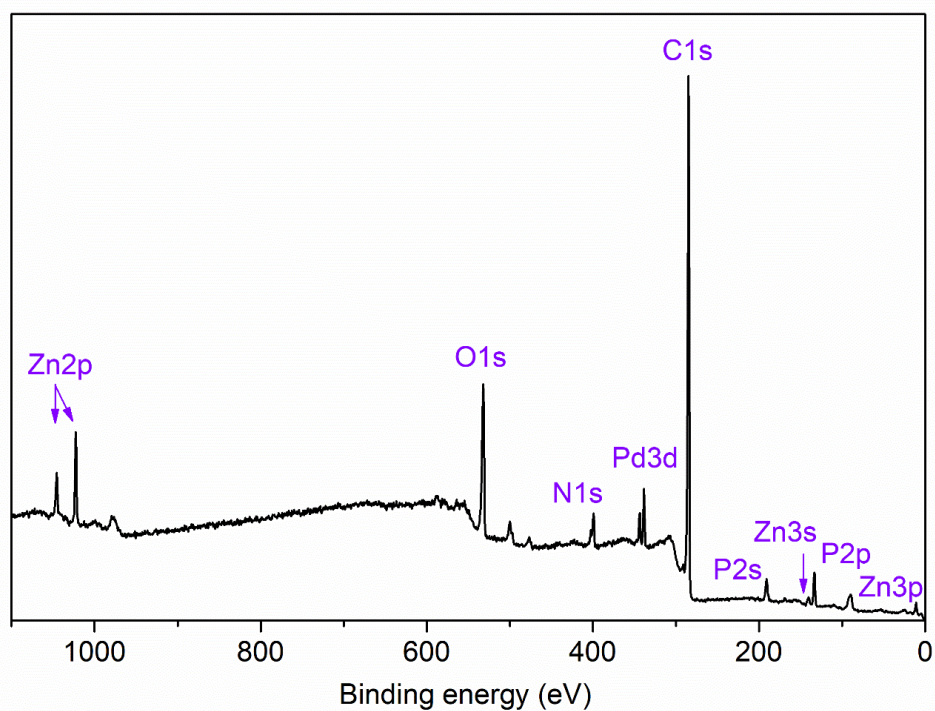

**Figure S16.** XPS spectrum of **IPCE-1Pd**.

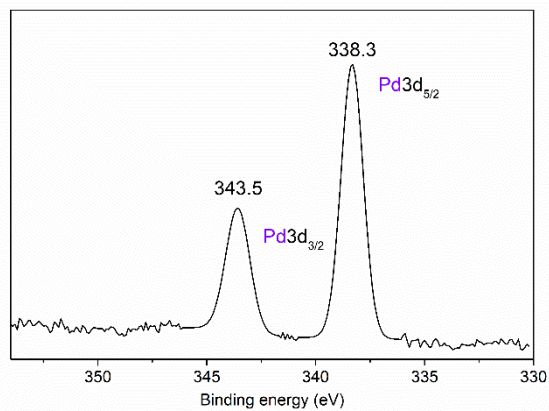

a.

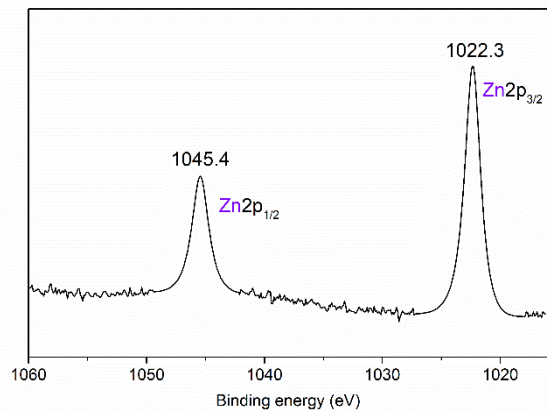

b.

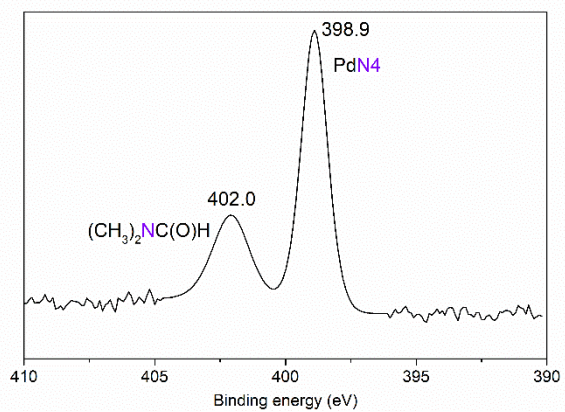

c.

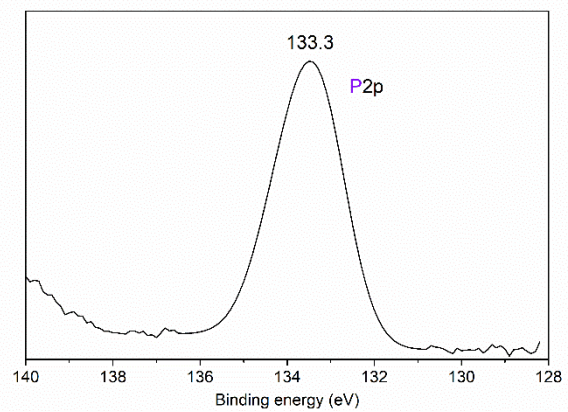

d.

**Figure S17.** (a) XPS spectrum of Pd3d of **IPCE-1Pd**. (b) XPS spectrum of Zn2p of **IPCE-1Pd**. (c) XPS spectrum of N1s of **IPCE-1Pd**. (d) XPS spectrum of P2p of **IPCE-1Pd**.

## Thermal investigations of IPCE-1Pd

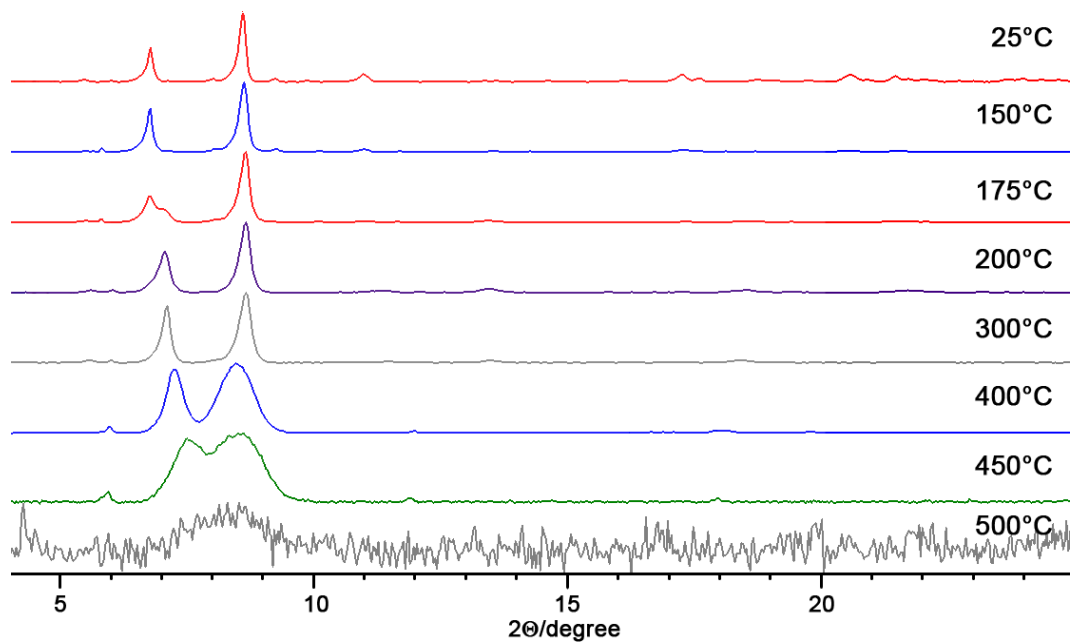

**Figure S18.** VT-PXRD patterns of **IPCE-1Pd** in the range of 25-500 °C.

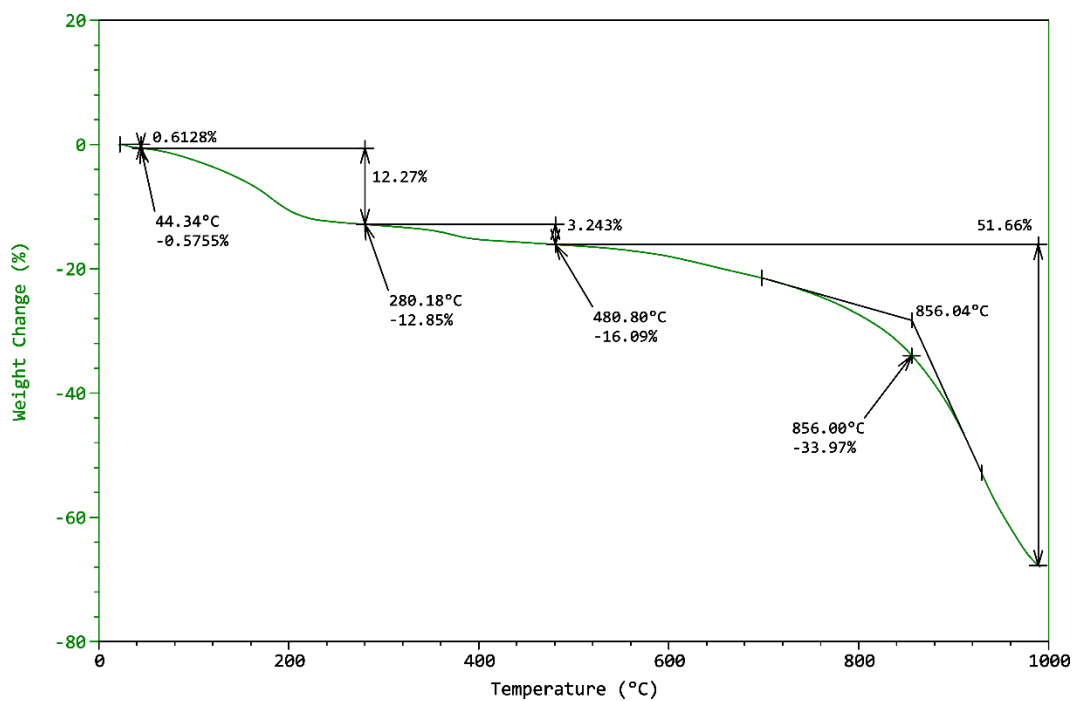

**Figure S19.** The TGA plot of **IPCE-1Pd**.

### Chemical stability of IPCE-1Pd

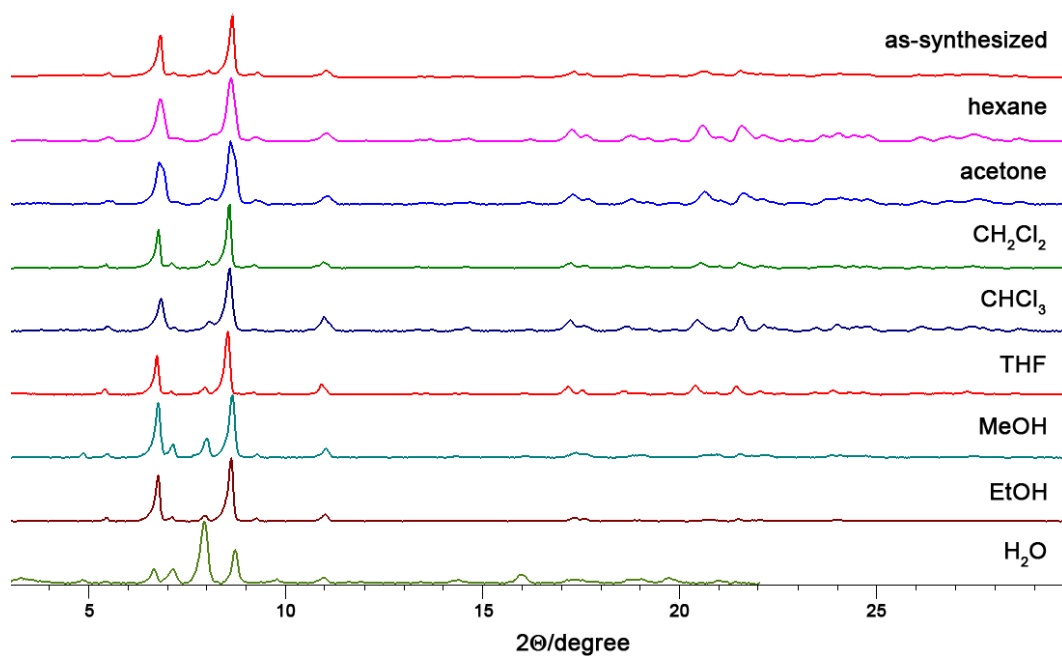

**Figure S20.** PXRD patterns of **IPCE-1Pd** treated by immersion in different solvents for 7 days.

### EDX data of IPCE-1Pd\_Im

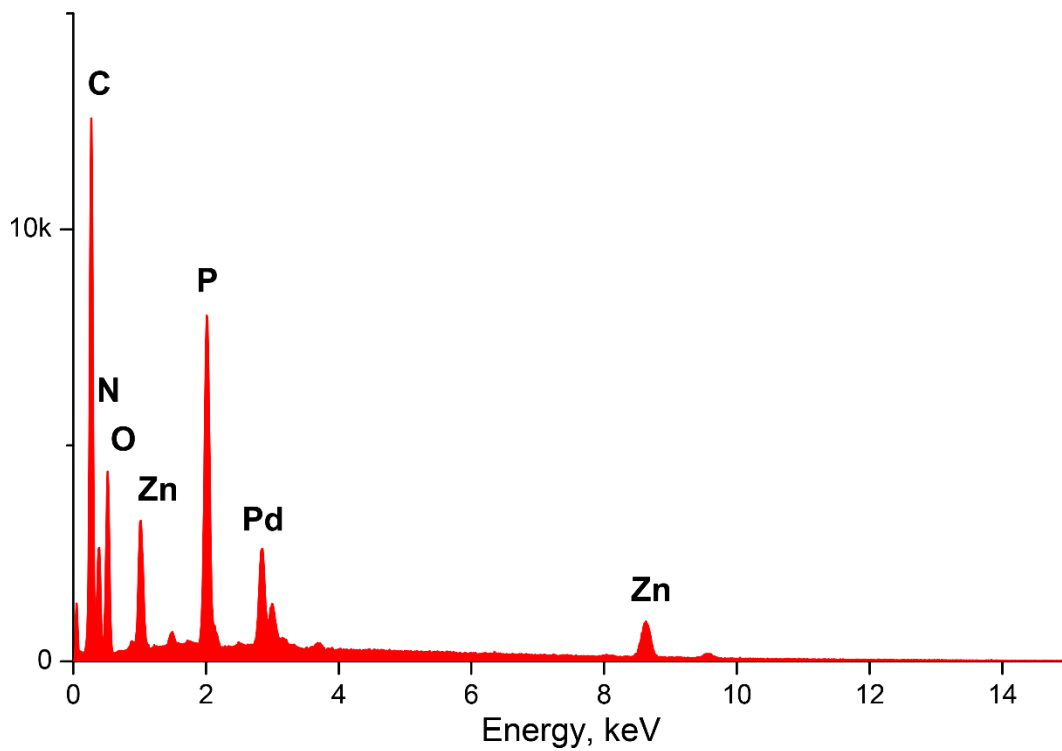

**Figure S21.** EDX spectrum of **IPCE-1Pd\_Im**.

**Table S10.** Elemental analysis of **IPCE-1Pd\_Im** based on EDS spectroscopy data.

| Element | C     | N     | O     | P     | Pd    | Zn    |
|---------|-------|-------|-------|-------|-------|-------|
| Wt, %   | 46.26 | 17.99 | 18.26 | 05.56 | 05.47 | 06.46 |
| At, %   | 58.30 | 19.44 | 17.27 | 02.72 | 0.78  | 01.50 |

### Thermal investigations of IPCE-1Pd\_Im

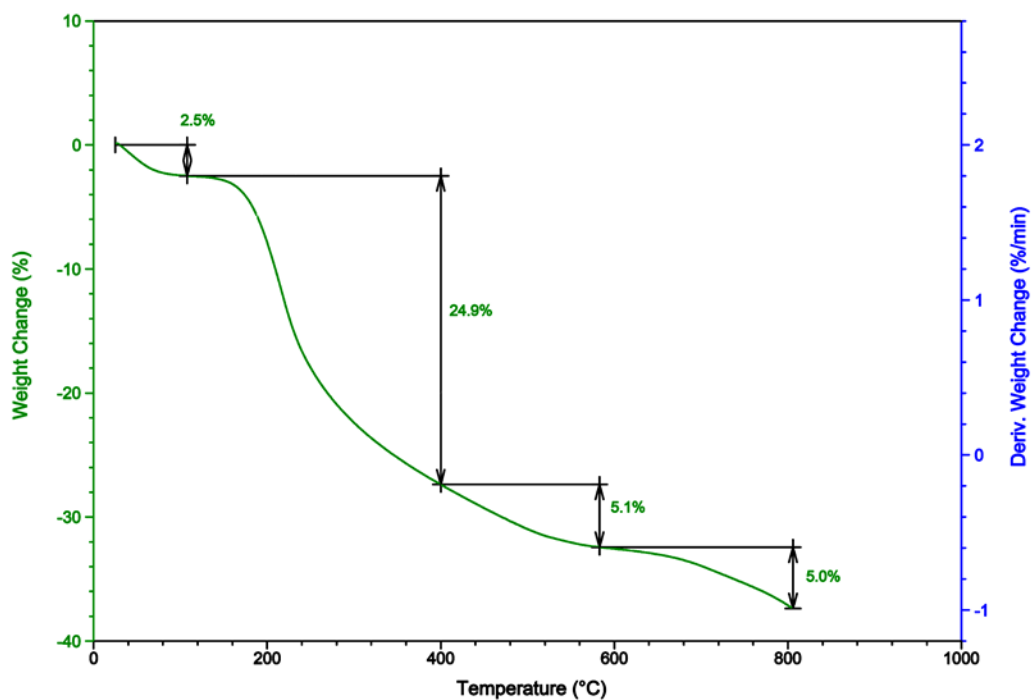

**Figure S22.** The TGA plot of **IPCE-1Pd\_Im**.

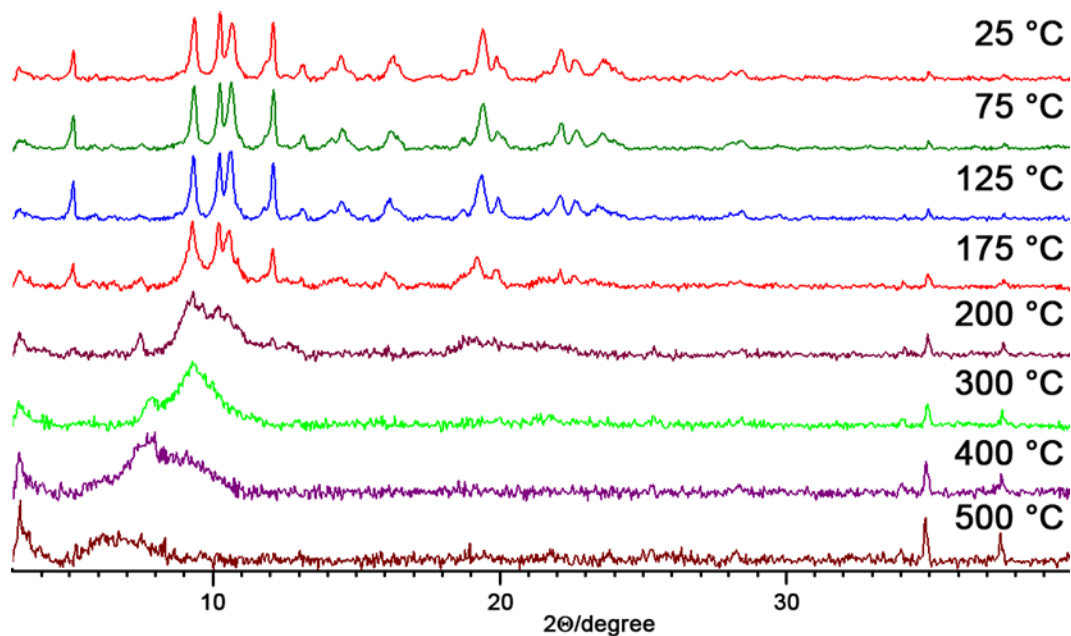

**Figure S23.** VT-PXRD patterns of IPCE-1Pd\_Im in the range of 25-500 °C.

### Proton conductivity of IPCE-1Pd and IPCE-1Pd\_Im

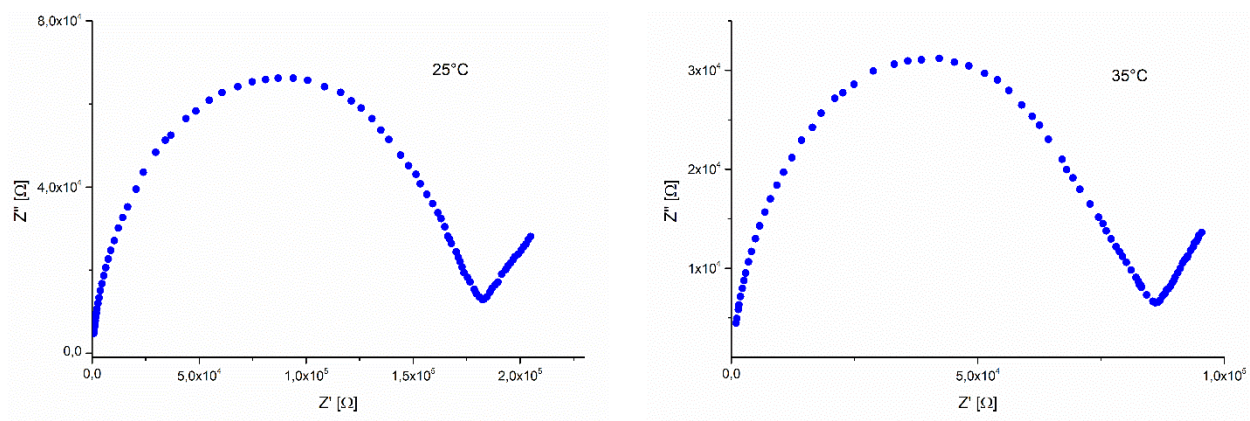



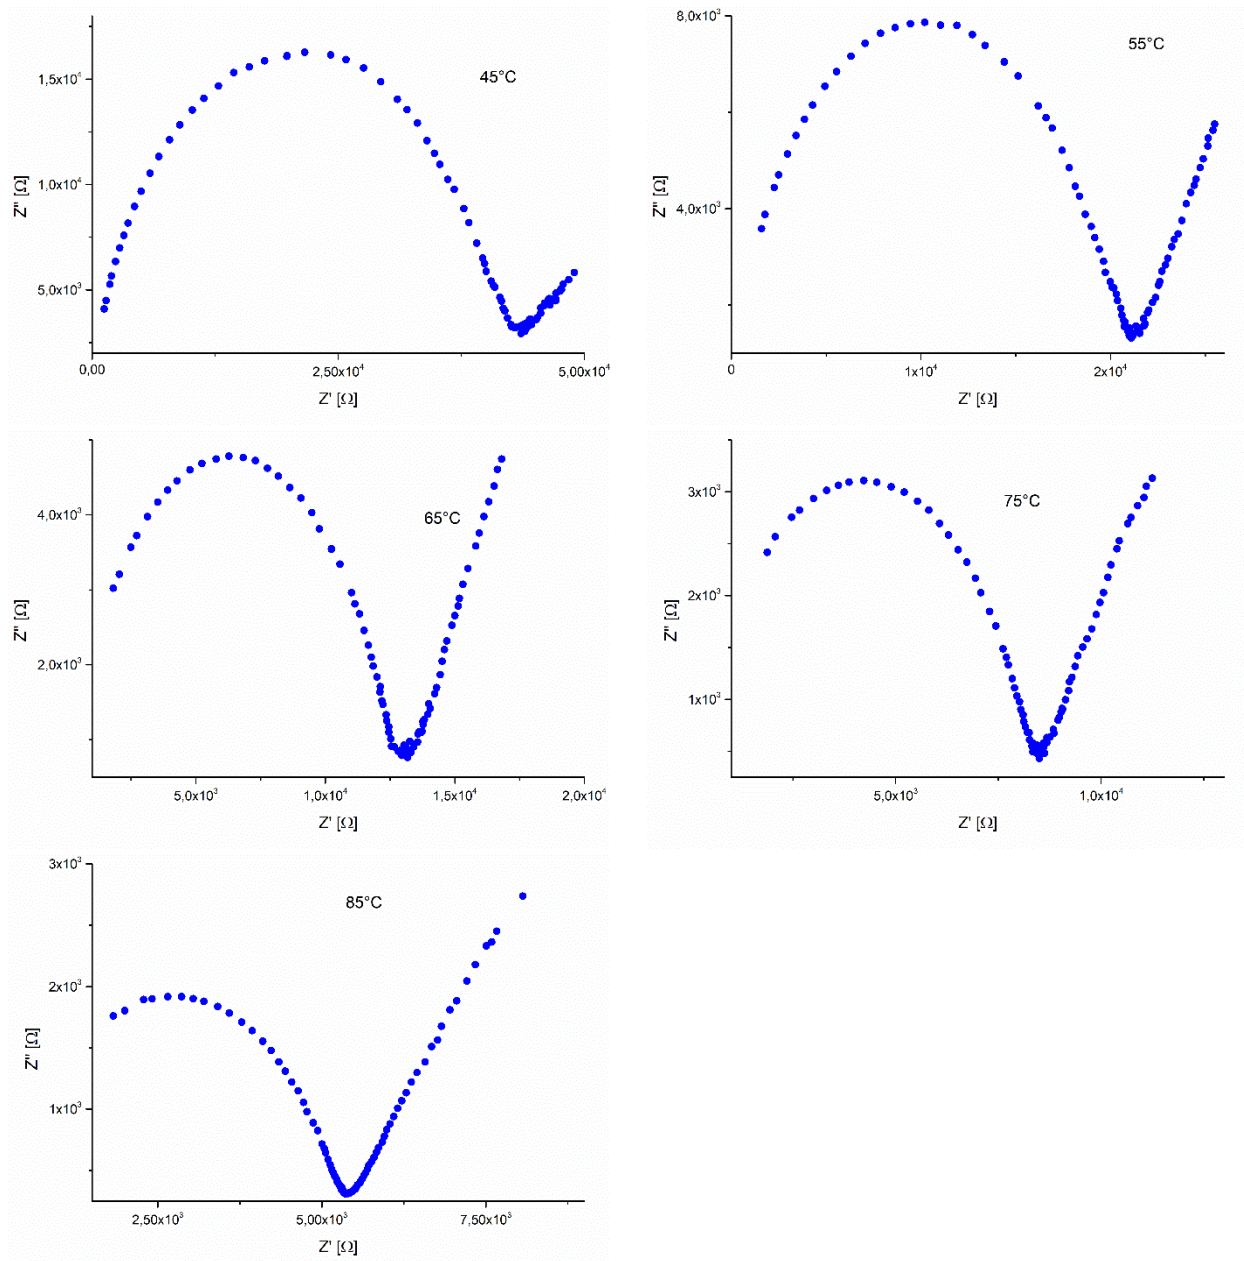

**Figure S24.** Nyquist plots of IPCE-1Pd at 85% RH and different temperatures.

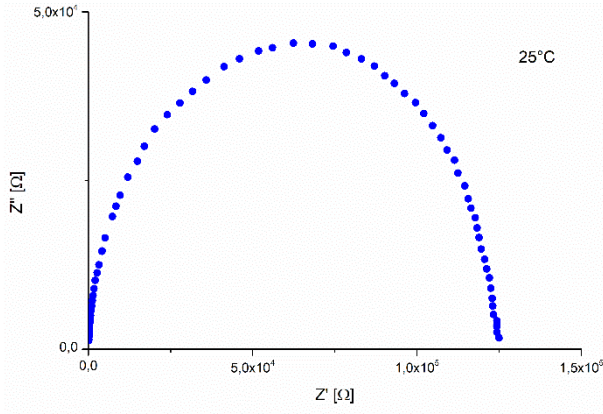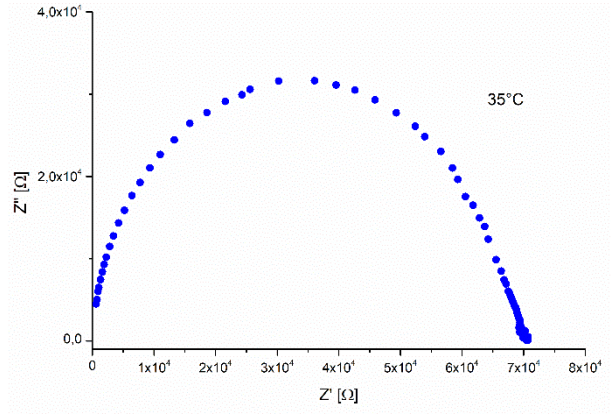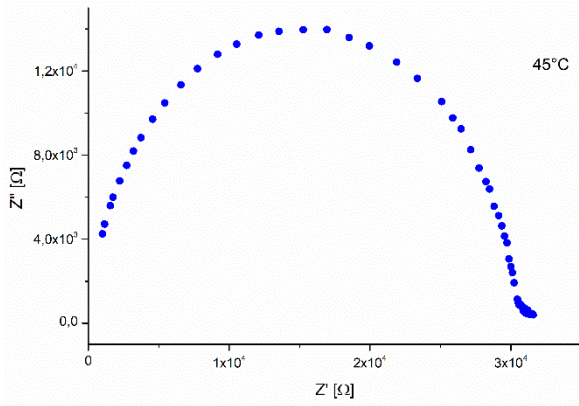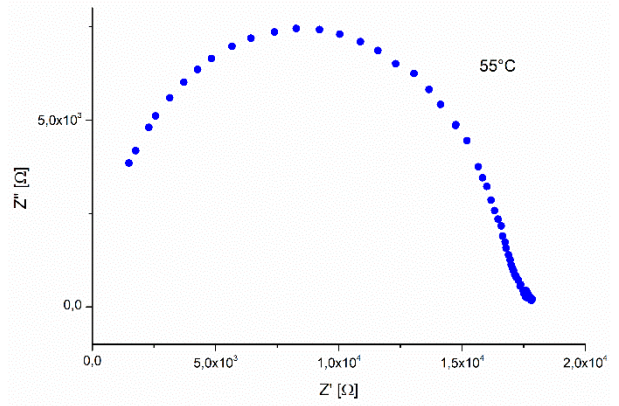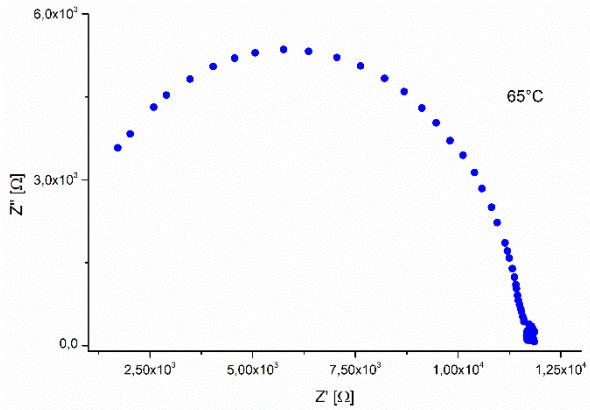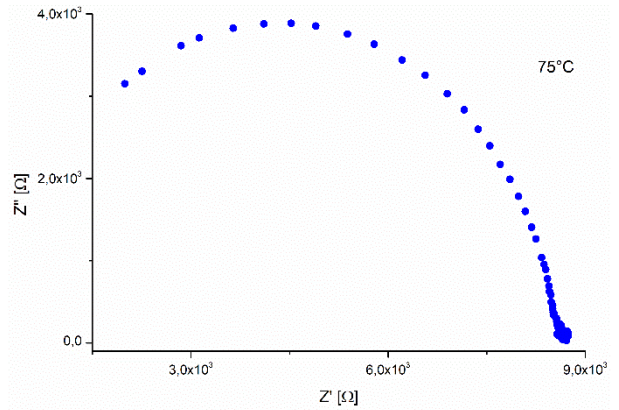

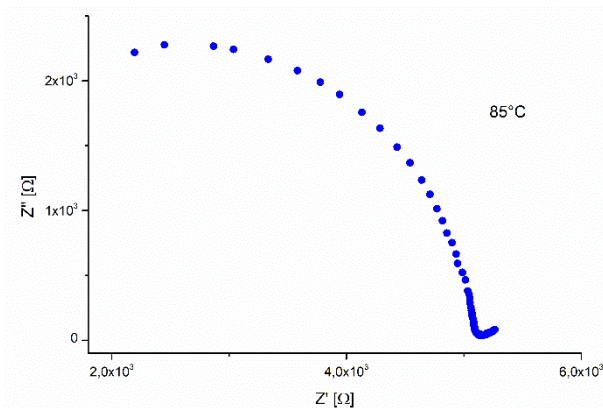

**Figure S25.** Nyquist plots of **IPCE-1Pd\_Im** at 85% RH and different temperatures.

### Crystal packings of IPCE-1Pd and IPCE-1Pd\_Im

#### IPCE-1Pd.

The coordinating Zn-O bonds link the molecules into 3D MOF with channels extending along the *b* axis (**Figure S26**). These channels are filled with *dmf* and H<sub>2</sub>O molecules which interact with rigid 3D framework *via* O-H...O hydrogen bonds (**Table S4**, **Figure S27**).

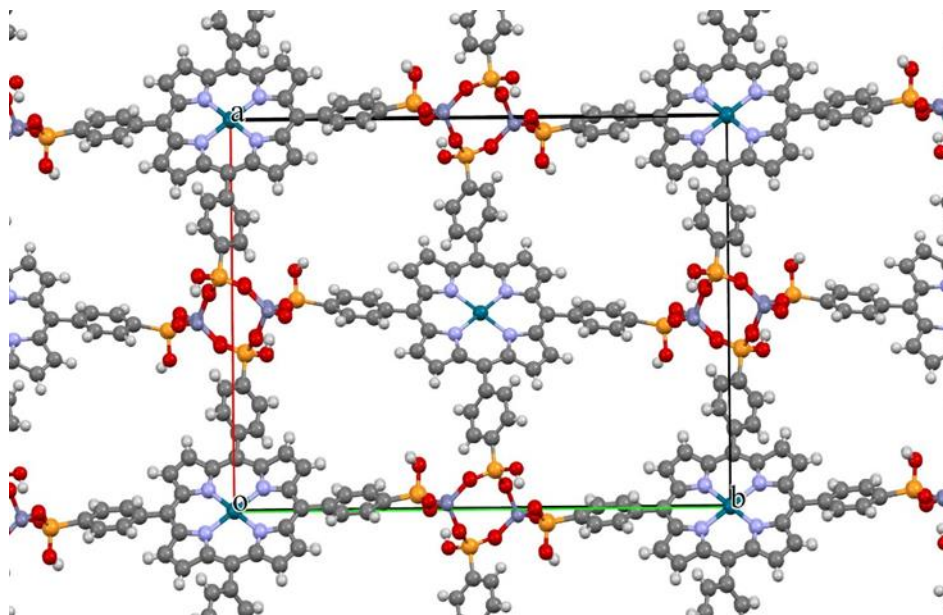

**Figure S26.** A portion of the crystal packing of **IPCE-1Pd** viewed along the *c* axis. The *dmf* and H<sub>2</sub>O molecules are not drawn to clearly show the empty channels.

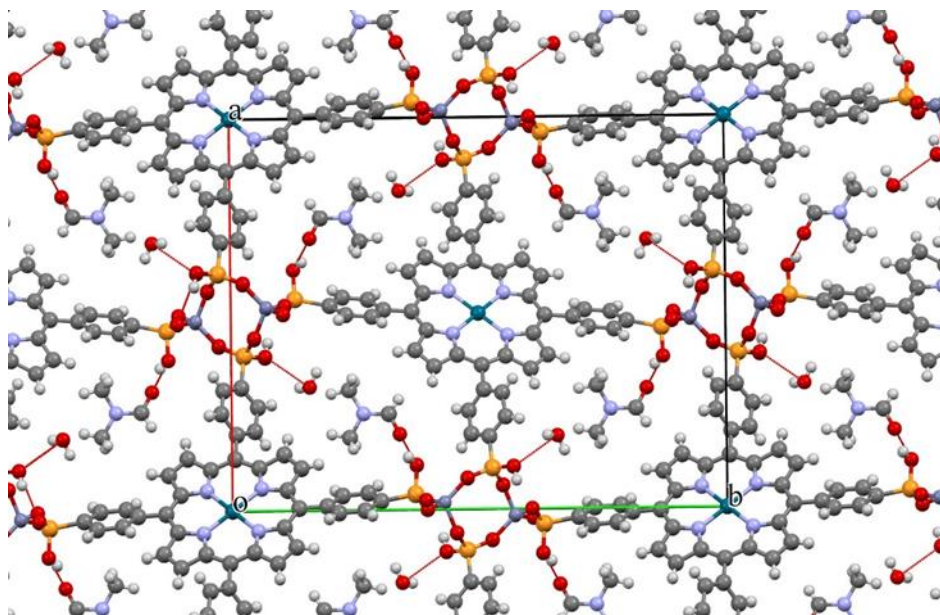

**Figure S27.** A portion of the crystal packing of **IPCE-1Pd** viewed along the *c* axis and showing the *dmf* and H<sub>2</sub>O molecules in the channels. Thin red lines denote intermolecular O-H...O hydrogen bonds.

### **IPCE-1Pd\_Im.**

To clearly show the formation of 3D HOF by the strong hydrogen bonds (with O,N...H distance < 2.05 Å) we exclude the disordered imidazole (N10/N11/C34-C36) and two water molecules (O1w, O2w), which are situated in the voids, from further consideration. In the crystal, the O6-H6...N9 hydrogen bond (Table S8) link the Pd-H<sub>7</sub>TPPP cations and imidazolate anions into 1D chains running in [102] direction (**Figure S28**). The N4-H4A...O4 hydrogen bond (Table S8) link the cations into the chains extending in [122] direction (**Figure S29**). A combination of two aforementioned hydrogen-bonds leads to formation of thick 2D layers (**Figure S30**). Finally, the O5-H5A-O5\* hydrogen bonds contribute to consolidation of 3D HOF structure.

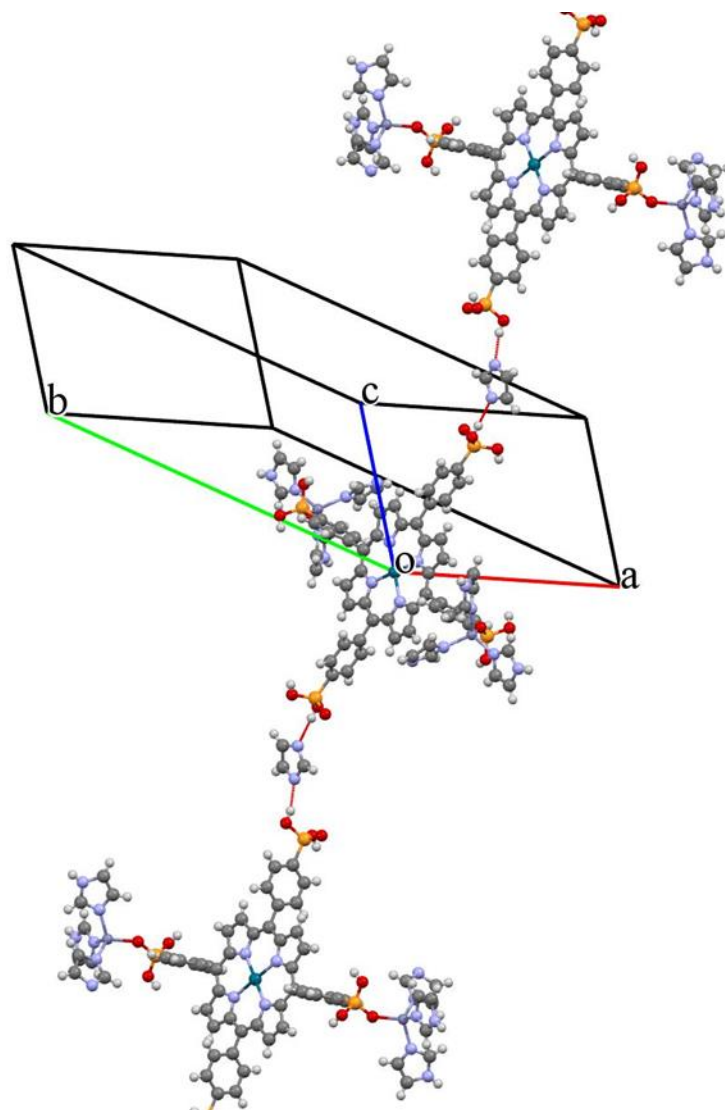

**Figure S28.** A hydrogen-bonded chain in **IPCE-1Pd\_Im** running in [102] direction. Thin red lines denote intermolecular O-H...N hydrogen bonds.

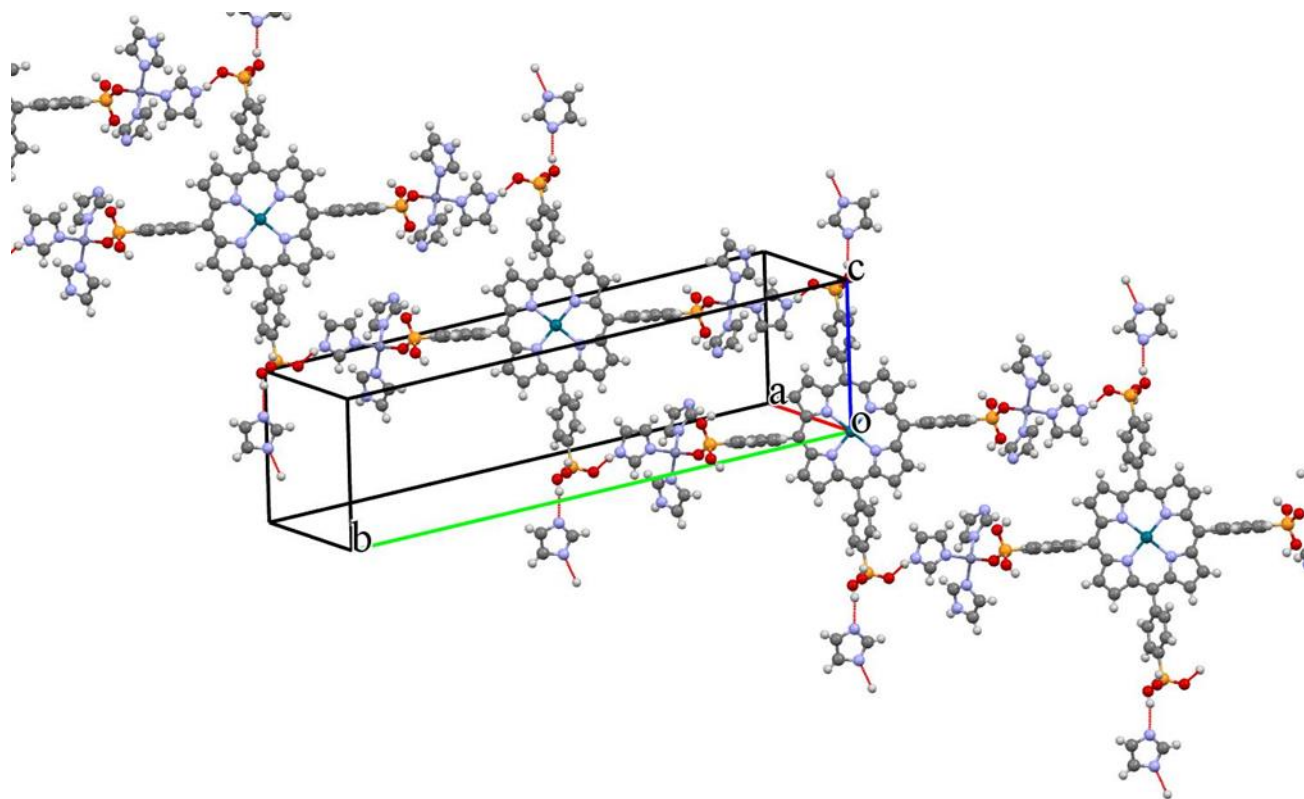

**Figure S29.** A schematic representation of the hydrogen-bonded chain of the cations in **IPCE-1Pd\_Im** extended in  $[122]$  direction. Thin red lines denote intermolecular N-H...O and O-H...N hydrogen bonds.

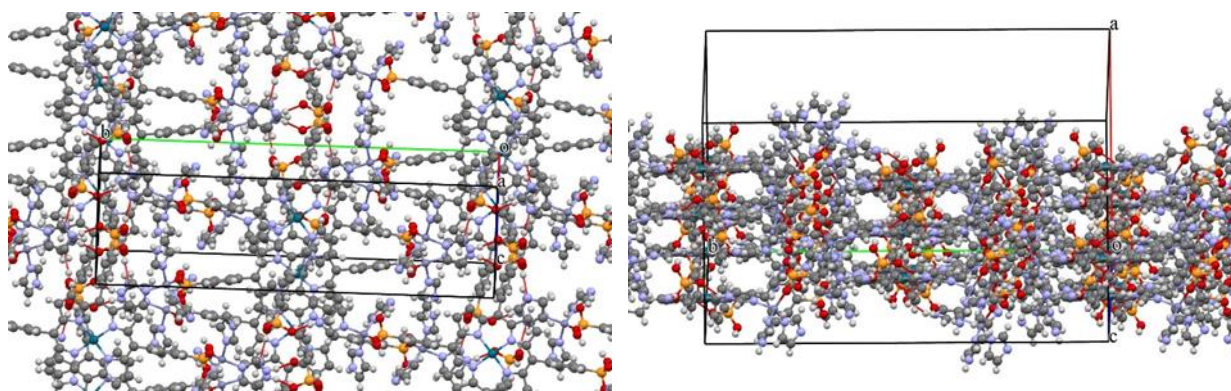

**Figure S30.** View of the hydrogen-bonded 2D layer in **IPCE-1Pd\_Im** in two orthogonal directions.

- (1) Enakieva, Y. Y.; Sinelshchikova, A. A.; Grigoriev, M. S.; Chernyshev, V. V.; Kovalenko, K. A.; Stenina, I. A.; Yaroslavtsev, A. B.; Gorbunova, Y. G.; Tsivadze, A. Y. Highly Proton-Conductive Zinc Metal-Organic Framework Based On Nickel(II) Porphyrinylphosphonate. *Chem. – A Eur. J.* **2019**, *25* (45), 10552–10556. <https://doi.org/10.1002/chem.201902212>.
- (2) Yu. Enakieva, Y.; Sinelshchikova, A. A.; Grigoriev, M. S.; Chernyshev, V. V.; Kovalenko, K. A.; Stenina, I. A.; Yaroslavtsev, A. B.; Gorbunova, Y. G.; Yu. Tsivadze, A. Porphyrinylphosphonate-Based Metal–Organic Framework: Tuning Proton Conductivity by Ligand Design. *Chem. – A Eur. J.* **2021**, *27* (5), 1598–1602. <https://doi.org/10.1002/chem.202003893>.
- (3) Enakieva, Y. Y.; Zhigileva, E. A.; Fitch, A. N.; Chernyshev, V. V.; Stenina, I. A.; Yaroslavtsev, A. B.; Sinelshchikova, A. A.; Kovalenko, K. A.; Gorbunova, Y. G.; Tsivadze, A. Y. Proton Conductivity as a Function of the Metal Center in Porphyrinylphosphonate-Based MOFs. *Dalt. Trans.* **2021**, *50* (19), 6549–6560. <https://doi.org/10.1039/D1DT00612F>.
